1  
2  
3  
4  
5  
6  
7  
8  
9  
10  
11  
12  
13  
14  
15  
16  
17  
18  
19  
20  
21  
22  
23  
24  
25  
26  
27

**Evaluation of long-term sequelae by cardiopulmonary exercise testing  
12 months after hospitalization for critical COVID-19**

Sofia Noureddine<sup>1\*</sup>, Pauline Roux-Claudé<sup>1\*</sup>, Lucie Laurent<sup>1</sup>, Ophélie Ritter<sup>1</sup>, Pauline Dolla<sup>1</sup>,  
Sinan Karaer<sup>1</sup>, Frédéric Claudé<sup>1</sup>, Guillaume Eberst<sup>1,2</sup>, Virginie Westeel<sup>1,2</sup>, Cindy Barnig<sup>1,3</sup>

<sup>1</sup> Department of Chest Disease, University Hospital Besançon, France

<sup>2</sup> Methodology and Quality of Life in Oncology Unit, University Hospital, Besançon, France  
and UMR 1098, University of Franche-Comté, Besançon, France

<sup>3</sup> University of Bourgogne Franche-Comté, INSERM, EFS BFC, UMR1098, Interactions  
Hôte-Greffon-Tumeur/Ingénierie Cellulaire et Génique, LabEx LipSTIC, F-25000  
Besançon, France

\*Shared co-first authorship

Address correspondence to:

Cindy Barnig

Department of Chest Disease,

University Hospital Besançon,

F-25000 Besançon, France

Tel: +33 3 81 66 88 02

e-mail : [cindy.barnig@univ-fcomte.fr](mailto:cindy.barnig@univ-fcomte.fr)

28 **Abstract**

29 **Background:** Cardiopulmonary exercise testing (CPET) is an important clinical tool that  
30 provides a global assessment of the respiratory, circulatory and metabolic responses to  
31 exercise which are not adequately reflected through the measurement of individual organ  
32 system function at rest. In the context of critical COVID-19, CPET is an ideal approach for  
33 assessing long term sequelae.

34 **Methods:** In this prospective single-center study, we performed CPET in 60 patients, 12  
35 months after a critical COVID-19 infection that required intensive care unit (ICU) treatment.  
36 Lung function at rest and chest computed tomography (CT) scan were also performed.

37 **Results:** Twelve months after severe COVID-19 pneumonia, the majority of the patients  
38 had a peak  $O_2$  uptake ( $V'O_2$ ) considered within normal limits. However, length of ICU stay  
39 remained an independent predictor of  $V'O_2$ . Surprisingly, more than half of the patients  
40 with a normal peak predicted  $V'O_2$  showed ventilatory inefficiency during exercise (high  
41  $VE/VCO_2$  ratio and high  $VE/VCO_2$  slope) with increased physiological dead space ( $VD/Vt$ )  
42 and low end-tidal  $CO_2$  partial pressure ( $PETCO_2$ ) values. This impairment was even more  
43 pronounced in patients with persistent dyspnea. Notably, peak  $VD/Vt$  values were  
44 positively correlated with peak D-Dimer plasma concentrations from blood samples  
45 collected during ICU stay.

46 **Conclusions:** Even if reduced exercise capacity was rare 12 months after critical COVID-  
47 19, more than half of the patients with normal exercise capacity showed ventilatory  
48 inefficiency.

49

50

51

## 52 **Background**

53 In December 2019, Wuhan city identified a new type of coronavirus, named severe  
54 acute respiratory syndrome coronavirus 2 (SARS-CoV-2), that rapidly spread all over the  
55 world and caused an immense global health crisis. Most patients presented mild to  
56 moderate respiratory disease, experiencing cough, fever, headache, myalgia, diarrhea and  
57 anosmia. However, around 3–20% of people with SARS-CoV-2 required hospitalization  
58 and a considerable subset needed intensive care because of respiratory failure with  
59 severe hypoxemia and bilateral radiographic opacities [1].

60 Studies found that most SARS-CoV-2 survivors, even those who were critically ill  
61 during hospital stay, have normal pulmonary function tests within 12 months after  
62 symptom onset [2]. Nevertheless, more than half of the patients who recover from  
63 Coronavirus disease 2019 (COVID-19) complain of long-term persistent dyspnea [3].

64 Cardiopulmonary exercise testing (CPET) is an important clinical tool that provides  
65 a global assessment of the respiratory, circulatory and metabolic responses to exercise  
66 which are not adequately reflected through the measurement of individual organ system  
67 function at rest [4]. In the context of COVID-19, CPET is an ideal approach for unmasking  
68 functional anomalies and long term sequelae. To date, only a few studies have  
69 investigated the exercise capacity in patients who have recovered from COVID-19.  
70 Assessment in the short-term post-COVID period revealed mostly a mild decrease in peak  
71  $O_2$  uptake ( $V'O_2$ ) and a low anaerobic threshold, without cardiac impairment or ventilatory  
72 limitation, suggestive of physical deconditioning [5, 6]. However, there is currently limited  
73 data on long term functional capacities in patients after COVID-19, especially after critical  
74 infection.

75 The aim of our study was to evaluate cardiopulmonary exercise capacities in a  
76 prospective cohort of patients that required critical care management during the first wave

77 of COVID-19, 12 months after symptom onset.

## 78 **Methods**

### 79 ***Study design and subjects***

80 This was a prospective single-center observational cohort study. All patients who  
81 were admitted between April to June 2020 to any of the intensive care units (ICU) of the  
82 University Hospital of Besançon (France) for a COVID-19 infection were contacted upon  
83 hospital discharge and invited to participate in the trial. Patients were eligible if they were  
84 >18 and < 80 years old and had initially confirmed SARS-CoV-2 infection by quantitative  
85 RT-PCR on nasal swabs or bronchoalveolar lavage. Patients were excluded if they were  
86 known to have prior chronic respiratory insufficiency, if they had a significant psychiatric  
87 pathology, or if they had a life expectancy estimated at less than one year. The protocol  
88 was approved by the ethics committee (Comité de Protection des Personnes (CPP)  
89 Grand-Est Ref 21 04 11) and written informed consent was obtained from all patients at  
90 the time of enrollment.

91 The study consisted of a follow-up at 3, 6 and 12 months after symptom onset  
92 (NCT04519320). From 149 patients that were initially admitted to intensive care with a  
93 diagnosis of SARS-CoV-2, a total of 85 patients were included in the cohort study (suppl  
94 Figure). Seventy-three patients (86%) completed the 12 months visit. A clinical evaluation,  
95 lung function tests, chest computed tomography (CT) and CPET were carried out on the  
96 same day. A total of 64 patients performed CPET (2 patients declined to perform CPET, 2  
97 had no negative RT-PCR control for SARS-CoV-2 and 6 had contraindications for  
98 performing CPET (pericardial effusion, acid-base disorders, orthopedic pathology and  
99 recent head trauma)). Four patients were excluded from the final analysis, 3 because of  
100 submaximal efforts and 1 patient that had presented severe arrhythmia during the test  
101 leading to an early exercise termination.

102

103

#### 104 ***Pulmonary function tests***

105 Pulmonary function tests were realized in all the patients and included spirometry,  
106 measurement of lung volumes by plethysmography and single-breath determination of  
107 diffusion capacity of the lung for carbon monoxide ( $D_{LCO}$ ) (Platinum Elite, MGC Diagnostic  
108 Corporation). Predicted normal values were derived from the reference values in  
109 accordance with current recommendations [7, 8]. The modified Medical Research Council  
110 (mMRC) dyspnea scale (0 to 4) was used to rate chronic dyspnea [9]. Participants were  
111 categorized as having dyspnea ( $mMRC \geq 1$ ) or not ( $mMRC = 0$ ).

#### 112 ***CT image acquisition and analysis***

113 Chest CT scans were acquired in the supine position at full inspiration without  
114 contrast medium (Revolution CT; GE Healthcare, Milwaukee, WI, USA). CT images were  
115 assessed by two readers blinded to clinical data that evaluated the presence and extent of  
116 ground-glass opacities (GGOs), reticulations, bronchiectasis, emphysema and  
117 honeycombing as defined by the glossary of terms of the Fleischner Society [10].

#### 118 ***Cardiopulmonary exercise test***

119 Symptom-limited incremental CPET was performed according to the ERS  
120 guidelines on an electronically braked cycle ergometer (Ergometrics 900; Ergoline; Bitz,  
121 Germany) [11].

122 After a steady-state resting period, a 3 min warm-up was conducted at about 20%  
123 of individually estimated maximal workload. A progressive increase in workload was then  
124 applied every minute (10 to 20 W/min) depending on the patient's physical condition,  
125 medical history and according to a total exercise time between 8 and 12 minutes. Tests

126 were terminated at the point of symptom limitation (peak exercise) or in the presence of  
127 electrocardiographic changes. Subjects rated the magnitude of their perceived breathing  
128 and leg discomfort by pointing to a number on the 10-point Borg scale [12]. Oxygen  
129 saturation with pulse oximetry, heart rate (HR) and 12-lead electrocardiogram (ECG) and  
130 non-invasive blood pressure measurements were monitored throughout exercise.

131 Breath-by-breath gas exchange values were measured using a Masterscreen CPX  
132 metabolic cart (MGC-CPX System; MGC Diagnostics Corporation) and were expressed as  
133 30 s averages, according to recommended guidelines. Minute ventilation ( $V'E$ ), oxygen  
134 uptake ( $V'O_2$ ), carbon dioxide production ( $V'CO_2$ ), end-tidal partial pressure of carbon  
135 dioxide ( $P_{et}CO_2$ ), tidal volume ( $V_t$ ) and breathing rate were recorded. Oxygen pulse  
136 ( $V'O_2$ /heart rate), ventilatory equivalent for oxygen uptake ( $V'E/V'O_2$ ) and ventilatory  
137 equivalent for carbon dioxide production ( $V'E/V'CO_2$ ) were calculated. The respiratory  
138 exchange ratio (RER) was defined as  $V'CO_2/V'O_2$ . The anaerobic threshold (AT) was  
139 determined by both ventilatory equivalents and V-slope methods.  $V'E/V'CO_2$  slope was  
140 calculated from rest to peak exercise.

141 Blood samples were drawn from the arterialized earlobe and measurements of  
142 partial pressure of oxygen ( $PaO_2$ ) and carbon dioxide ( $CO_2$ ) were performed at rest, at  
143 anaerobic threshold (AT) and at peak exercise. Lactatemia was determined at rest, at AT,  
144 at maximal exercise and 5 min of recovery time. Breathing reserve (BR) % was calculated  
145 as  $BR = (\text{predicted maximum voluntary minute ventilation [MMV]} - \text{peak VE})/\text{MMV} \times 100$ ,  
146 with predicted MMV =  $FEV_1 \times 40$ . Peak heart rate (HR) was expressed as a percentage of  
147 maximum predicted HR, calculated as  $HR_{max} = 210 - (0.65 \times \text{age})$ . Physiological dead  
148 space ( $VD/V_t$ ) was calculated according to Bohr's equation corrected for the additional  
149 instrument dead space:  $VD/V_t = (PaCO_2 - P_{et}CO_2 \text{ mean})/PaCO_2 - (VD [\text{machine}]/V_t)$ .

150 Tests were considered maximal if a plateau of the  $V'O_2 > 60$  seconds was obtained  
151 (variation of  $V'O_2 < 150$  mL between 2 increments), RER  $> 1.1$ , a perceived exertion  $> 7$  on

152 the Borg scale, peak HR > 100% of predicted, breathing reserve <15% and/or important  
153 metabolic acidosis.

154 Normal predicted values for  $V'O_2$  were calculated according to the reference  
155 equation of Wassermann [13]. A reduced peak exercise capacity was defined by a peak  
156  $V'O_2$  < 85% of predicted [4].

### 157 ***Statistical analyses***

158 Statistical analysis was performed using GraphPad Prism version 9.0 (GraphPad  
159 Software Inc., San Diego, CA, USA). Normal distribution of quantitative variables was  
160 tested by the Kolmogorov-Smirnov test. Descriptive statistics are presented as mean  $\pm$   
161 standard deviation (SD), median (25<sup>th</sup> to 75<sup>th</sup> percentile), or number (%), as appropriate.  
162 Student's T or Mann–Whitney U-test tests were computed to assess statistical differences  
163 between groups for normal or non-normal quantitative variables, respectively. Categorical  
164 variables were analyzed by Fisher's exact test when appropriate. Correlations were  
165 examined by Spearman rank test or Pearson test. Multiple linear regression was applied  
166 for peak  $V'O_2$  (ml/kg/min) as dependent variable, using a stepwise approach of potential  
167 determinants that showed significant associations in previous univariate analysis. Age, sex  
168 and body mass index (BMI) were included in the final multivariable model. The reported p  
169 values were two-sided, with a significance level set at  $p < 0.05$ .

170

171

172

173

174

175

## 176 **Results**

### 177 ***Baseline characteristics of the study population***

178         The demographics, comorbidities and ICU treatments of patients at inclusion are  
179 summarized in Table 1. The mean age was 64.6 years ( $\pm$  9.6), 78% were male. All  
180 patients were initially admitted in an intensive care unit (ICU) and were treated according  
181 to local standards at that time. The majority of the patients fulfilled criteria for initial ARDS  
182 according to the Berlin definition [14], 90% were intubated, 45% received steroids and  
183 more than 90% received early anticoagulant therapy. A pulmonary embolism was  
184 diagnosed in 27% of the patients during their stay. Peak values during ICU stay for main  
185 blood laboratory findings are shown in Table 1. All patients included in the study had early  
186 rehabilitation during their hospital stay. More than half of the patients (65%) were further  
187 referred to a pulmonary rehabilitation center and most of the other patients had regular  
188 home physiotherapy sessions after their hospital discharge.

### 189 ***Characteristics of the study population at 12 months follow-up***

190         The clinical, pulmonary function tests and imaging characteristics of the patients at  
191 12 months follow-up are summarized in Table 2. Persistent dyspnea was reported by half  
192 of the patients (50%) (mMRC scale  $\geq$  1). Only a minority of patients had functional  
193 pulmonary impairment at rest. Two patients showed a mild restrictive ventilatory pattern,  
194 and 4 patients had airflow obstruction, three of them had a previous diagnosis of COPD.  
195 Mildly impaired DLCO, defined as Z-score DLCO  $<$  -1.64, was present in 6 patients (10%),  
196 4 were already diagnosed with COPD before SARS-CoV2 infection. High resolution  
197 computed tomography (HRCT) of the chest showed pulmonary abnormalities in 50



198 patients (84%). Cardiac evaluation at rest was only proposed to patients that had  
199 presented pulmonary embolism during their hospital stay. In these patients, transthoracic  
200 echocardiography was within normal limits with no signs of pulmonary hypertension.

### 201 ***Cardiopulmonary exercise test (CPET) results at 12 months follow-up***

202 Adequate exercise test efforts were obtained in all the patients analyzed. Table 3  
203 summarizes the main exercise parameters of the study cohort at the anaerobic threshold  
204 (AT) and at peak. Most of the patients had an adequate  $V'O_2$  at AT (median predicted  
205 64.8% [57.2-70.9]). The median peak predicted  $V'O_2$  was 98 % [87.2-106.3] (mean peak  
206  $V'O_2$  21.7  $\pm$  5.2 mL/min/Kg). Reasons for stopping exercise were leg discomfort in 55% of  
207 patients, breathing discomfort in 36.6% patients and both in 5% patients.

208 Circulatory parameters revealed a mean peak predicted oxygen pulse at 103.7 % ( $\pm$   
209 19.9). Only 8 patients had a mildly decreased  $O_2$  pulse, 3 of them were under  
210 betablockers. The mean peak predicted heart rate was 96.6 % ( $\pm$  12.7), and the median  
211 HR/ $V'O_2$  slope was in the limit of normal at 41.9 (33.6-48.7).

212 Mean respiratory equivalents at peak were slightly elevated compared to expected  
213 values ( $V'E/V'O_2$  ratio at 42.7 [ $\pm$  6.6] and  $V'E/V'CO_2$  ratio at 37.5 [34-42]) and the mean  
214  $V'E/V'CO_2$  slope from rest to peak was also slightly skewed to increased values compared  
215 to expected values (37.2  $\pm$  6.7) [15]. There was also a trend to a widened median alveolar-  
216 arterial  $O_2$  pressure difference at peak (35.2 mmHg [31.2-44.8]).

### 217 **Predictors of peak oxygen uptake**

218 We next examined the relationship between peak  $V'O_2$  (ml/min/kg) and variables of  
219 interests. Univariate analysis revealed that peak  $V'O_2$  was strongly correlated to the 6-  
220 minute walk test (MWT) distance recorded at 12 months (Figure 1a). As expected,  
221 absolute values of lung function test parameters at 12 months ( $FEV_1$ , VC and  $D_{LCO}$ ) were  
222 significantly associated to peak  $V'O_2$  (suppl Table 1).

223           Among variables recorded during the management of the acute COVID-19  
224 infection, length of ICU stay showed the most significant correlation with peak  $V'O_2$  (Figure  
225 1b). Simplified acute physiology score (SAPS II) and length of curarization had a weaker  
226 correlation with peak  $V'O_2$  (suppl Table 1).

227           In a multiple linear regression analysis, the length of ICU stay remained an  
228 independent predictor of  $V'O_2$  and combined to age, sex, and BMI explained 57% of the  
229 variance of  $V'O_2$  peak at 12 months (Table 4).

### 230 **Comparison of patients with reduced and normal exercise capacity**

231           Twelve patients (20%) had reduced peak exercise capacity ( $V'O_2$  <85% of  
232 predicted) (Table 5). The median peak predicted  $V'O_2$  (82% [73.9-83.9]) and workload  
233 (85.7 % [80.1-96.9]) were only mildly decreased. When compared to patient with  
234 preserved peak exercise capacity, patients with reduced capacity had a significantly higher  
235 BMI ( $33.4 \pm 6.2$  vs  $30.1 \pm 4.5$ ,  $p=0.04$ ) and a significantly longer ICU stay ( $29.7 \pm 13.1$  vs  
236  $19.1 \pm 11.3$   $p=0.006$ ). No significant differences were observed between both groups  
237 regarding age, other prior comorbidities, pulmonary embolism during ICU stay and  
238 respiratory rehabilitation. No significant differences were observed for CT scan  
239 abnormalities. However, patients with a reduced exercise capacity had a significantly lower  
240 % predicted FEV1 ( $97.4 \pm 16.9$  vs  $110.8 \pm 19.7$ ;  $p=0.03$ ), FVC ( $97.5 \pm 17.8$  vs  $110.8 \pm$   
241  $16.9$ ,  $p=0.01$ ) and a lower % predicted  $D_{LCO}$  ( $91.3$  (65.6-98.1) vs  $103$  (92.3-114.2);  
242  $p=0.01$ ). Assessment of each individual with limited peak exercise capacity revealed that  
243 the primary limitation was ventilatory limitation in 6 patients (50%). Among patients with  
244 ventilatory impairment, 5 of them were former smokers and had prior COPD and/or lung  
245 emphysema on chest CT. Physical deconditioning was observed for the 6 (50%) others  
246 patients.

247           In the group of patients having an exercise capacity considered within normal limits,

248 the median peak predicted  $V'O_2$  was 101.6 % [94.8-107.5] (mean of 23.0 ml/kg/min [ $\pm$ 4.7])  
249 (Table 5). The main reasons for termination were leg discomfort in 52.1% of patients and  
250 dyspnea in 37.5%. Despite having a normal exercise capacity, it was worth noting that  
251 patients had increased mean ventilatory equivalents for  $CO_2$  with a mean peak  $V'E/V'CO_2$   
252 at 37.5 (34-41) and a mean  $V'E/V'CO_2$  slope from rest to peak at 37.2 [ $\pm$ 6.6]. The median  
253 median alveolar-arterial  $O_2$  pressure difference at peak appeared also widened (34.7  
254 mmHg [31.7-43.9]).

### 255 **Ventilatory efficiency parameters in patients with normal exercise capacity**

256 As we observed that a majority of patients with normal exercise capacity showed  
257 elevated mean ventilatory equivalents for  $CO_2$  during exercise, we next focused on the  
258 evolution of ventilatory efficiency parameters in this group.

259 It was worth noting that at AT, 18 of those 48 patients (37.5%) had a  $V'E/V'CO_2$   
260 ratio > 35 and 7 patients (14.6%) had even a  $V'E/V'CO_2$  ratio > 40. At peak exercise,  
261 56.2% (n=27) of patients had a  $V'E/V'CO_2$  slope > 35 and 41.7% (n=20) had a  $V'E/V'CO_2$   
262 slope > 40. Anarchical evolution of tidal volume was not observed. In contrast, elevated  
263 ventilatory equivalents for  $CO_2$  were associated with abnormal dead space ventilation.  
264 Indeed, an abnormal increase of the physiological dead space from AT to peak was  
265 observed in 68.1% (n=32) of the patients with a median  $VD/Vt$  of 0.27 (0.21-0.32) at AT  
266 and 0.29 (0.25-0.34) at peak (Figure 2a). Moreover, the median peak alveolar-arterial  
267 gradient for  $O_2$  was abnormally elevated (35.2 mmHg [31.2-44.8]) with 48.9 % of patients  
268 (n=23) having a  $P(A-a) \geq 35$  mmHg (Figure 2b).  $PetCO_2$  at peak was significantly lower in  
269 subjects with an abnormal increase of  $VD/Vt$  ( $p=0.001$ ) (Figure 2c).

270 Univariate analysis revealed that dead space at peak ( $VD/Vt$ ) was associated with  
271 parameters related to pulmonary exchange capacity at rest (pulmonary diffusing capacity)  
272 and during exercise ( $V'E/V'CO_2$  ratio and slope,  $PetCO_2$ ,  $pO_2$  and alveolar-arterial gradient  
273 (Table 6). Notably, dead space at peak was positively correlated to D-Dimer plasma

274 concentration from blood samples collected during ICU stay. Reanalysis after excluding  
275 patients with pulmonary embolism during ICU stay did not alter this correlation.

276 Interestingly, patients with persistent dyspnea (n=23) had a significantly higher  
277 mean peak dead space ( $0.32 \pm 0.07$  vs  $0.28 \pm 0.06$ ;  $p=0.04$ ) and a higher widening of their  
278 mean peak alveolar-arterial gradient ( $40.9 \pm 9.8$  vs  $34.2 \pm 5.9$ ;  $p=0.006$ ) (Supl Table 2).  
279 There was no significant difference for the mean peak VE/VCO<sub>2</sub> ratio and the mean  
280 VE/VCO<sub>2</sub> slope. Performance and circulatory parameters during exercise were also similar  
281 between both groups. As expected, breathlessness was the predominant symptom that  
282 resulted in test termination in patients with persistent dyspnea. Patients with persistent  
283 dyspnea were slightly older. No differences were observed for any other parameters  
284 recorded during initial hospitalization including the presence of pulmonary embolism  
285 between patients with and without persistent dyspnea. Lung function at rest was also  
286 similar at 12 months between both groups (Supl Table 2).

287

288

289

290

291

292

293

294

295

296

297

298

299

300

301

302

303

304

## 305 **Discussion**

306           This prospective study assessed cardiopulmonary exercise performance in 60  
307 patients, 12 months after a critical COVID-19 infection during the first wave that required  
308 initial ICU management. The patients of our cohort presented well-established risk factors  
309 for severe COVID-19 such as advanced age, a predominance of male sex and a high BMI  
310 [16]. As expected, hypertension and dyslipidemia were the most frequent chronic  
311 comorbidities.

312           Despite the severity of the initial clinical presentation, exercise capacity assessed  
313 by CPET were within normal limits in most of the patients 12 months after the acute  
314 infection. Impairment was predominantly related to persistent deconditioning or prior  
315 respiratory co-morbidities. These results confirm previous studies assessing exercise  
316 capacity by CPET 3 to 6 months after hospital release and reporting that remaining  
317 exercise limitation after COVID-19 is primarily related to physical deconditioning rather  
318 than to physiological impairment [5, 6, 17, 18]. Thus, recovery of physical capacities after a  
319 critical COVID-19 infection appears better than in patients with other ARDS etiologies [19,  
320 20].

321           In our study, 12 months after the acute infection, the length of ICU stay was still an  
322 independent predictor of peak  $V'O_2$ , including the patients that had recovered a peak  $V'O_2$   
323 considered within normal limits. Even if other studies have already reported associations

324 between length of ICU stay after COVID-19 and peak  $V'O_2$  [21, 22], we were surprised that  
325 this association remained still true several months after hospital release. This was even  
326 more unexpected as all our patients had received early physiotherapy management in the  
327 acute hospital setting followed by either inpatient rehabilitation or extensive physiotherapy  
328 for several weeks at home for most of them.

329 Another intriguing observation in our study was that many patients having a peak  
330  $V'O_2$  within normal limits and normal rest lung function, showed ventilatory inefficiency  
331 during exercise, with increased  $V'E/V'CO_2$  ratios at AT and at peak associated with an  
332 increased  $V'E/V'CO_2$  slope. Ventilatory inefficiency after acute COVID-19 has already  
333 been reported but mainly attributed to dysfunctional breathing with inappropriate  
334 hyperventilation suggestive of post-traumatic syndrome [23]. In contrast to our study, these  
335 studies enrolled predominantly patients having had mild COVID-19 [21, 24-26].

336 In our patients, there was no evidence of exaggerated hyperventilatory response.  
337 Indeed, we did not see abnormal respiratory alkalosis, nor anarchical evolution of tidal  
338 volume. However, ventilatory inefficiency was associated in our study with increased  
339 physiological dead space ventilation. Indeed, we observed that nearly two-thirds of the  
340 patients with a normal peak predicted  $V'O_2$  exhibited an increase of the  $VD/Vt$  ratio  
341 between AT and peak exercise. Ventilatory inefficiency without hyperventilation syndrome  
342 has been suggested by other groups but these studies included patients with a range of  
343 disease severity combining data from outpatients, hospitalized patients, and those who  
344 had required admission to the ICU [22, 27]. Of interest, Ambrosino *et al.* identified in a  
345 study that included mostly severe-to-critical COVID-19 patients without any prior history of  
346 cardiovascular or pulmonary disease shortly after hospital release, higher  $VE/VCO_2$  ratios  
347 and  $VE/VCO_2$  slopes and a lower  $VD/Vt$  decrease among patients with reduced exercise  
348 capacity [28].

349 In healthy individuals,  $VD/Vt$  decreases usually during exercise as  $Vt$  increases

350 several folds and to a much greater extent than the small increase in VD [29]. An increase  
351 of the physiological dead space ventilation during exercise is usually considered as  
352 abnormal and may suggest the presence of several cardiac and pulmonary disorders.  
353 However, increasing VD/VT during exercise is mostly sensitive for pulmonary vascular  
354 disease [30-32]. As in our study the majority of patients with normal exercise capacity had  
355 normal rest pulmonary function and no cardiovascular abnormalities, the increase of  
356 physiological dead space ventilation associated to a low peak PetCO<sub>2</sub> may point to  
357 pulmonary vascular disease.

358 It is now apparent that SARS-CoV-2 infection induces endothelial cell dysfunction  
359 with systemic inflammatory response resulting in a prothrombotic state manifesting  
360 especially with microthrombosis [1]. Notably, in our study, peak VD/Vt values at 12  
361 months were positively correlated to peak D-Dimers plasma concentrations from blood  
362 samples collected during ICU stay. D-Dimers are a strong biomarker for hypercoagulability  
363 and thrombotic events and can be linked to endothelial dysfunction reported during acute  
364 COVID-19 [33, 34]. Therefore, the observed ventilatory inefficiency in our patients may  
365 point to infra-clinical pulmonary vasculopathy sequelae due to lung micro-thrombotic  
366 events during acute SARS-CoV-2 infection. In a study aiming to quantify endothelial  
367 alterations in 23 patients with moderate to critical COVID-19, sublingual video microscopy  
368 confirmed microcirculatory alterations that were closely associated with D-Dimer levels  
369 [35]. More recently, in a cohort of severe-to-critical COVID-19 patients, Ambrosino *et al.*  
370 showed that persistent endothelial dysfunction explored by ultrasound assessment of  
371 endothelium-dependent flow-mediated dilation (FMD) was correlated to ventilatory  
372 inefficiency parameters during CPET in a subgroup of patients [28].

373 Half of our patients, including those who had an exercise capacity within normal  
374 limits, still complained of persistent dyspnea. A recent study evaluating the health-related  
375 quality of life and persistent symptoms in critically ill COVID-19 patients at twelve months

376 identified a similar proportion with 58.4% of patients with persistent mild dyspnea that was  
377 weakly correlated with both DLCO and length of invasive mechanical ventilation [36]. In  
378 our study, we found no clear association between dyspnea, length of ICU stay, effort  
379 capacity or rest lung function parameters. However, patients with persistent dyspnea had  
380 significantly higher mean peak dead space associated to a higher widening of their mean  
381 peak alveolar-arterial gradient during exercise.

382         Some potential limitations of our study should be noted. Our study was conducted  
383 in a single center. There was also a missing baseline assessment of cardiopulmonary  
384 function at rest before SARS-CoV-2 infection in our patients. Even if nearly all the patients  
385 with normal exercise capacity and ventilatory inefficiency at exercise had spirometry and  
386 predicted DLCO within normal limits, it would have been interesting to compare the results  
387 with matched controls. Indeed, more than half of our study cohort were smokers or former  
388 smokers. Moreover, we were not able to measure the diffusing capacities of the lung for  
389 nitric oxide (NO) which combined to  $D_{LCO}$  would have been useful to evaluate more  
390 precisely the pulmonary vascular implication. Finally, all patients of our cohort were treated  
391 according to local standards at the time of the first wave of COVID-19. Consequently, only  
392 45% of them received corticosteroids but notably all of the patients were precociously  
393 anticoagulated during their ICU stay.

394

395

396

397

398

399

400



401

402

403

404

405

406

407 **Conclusion**

408           In the current study we report that 12 months after critical COVID-19 most of the  
409 patients had a peak  $V'O_2$  considered within normal limits. The length of the ICU stay  
410 remained a significant predictor of peak  $V'O_2$  and therefore prolonged cardiopulmonary  
411 rehabilitation and exercise activity should be encouraged in this population. Notably, more  
412 than half of the patients who had a normal exercise capacity were still complaining of  
413 persistent dyspnea and two-thirds showed abnormal ventilatory efficiency during exercise  
414 suggestive of pulmonary vasculopathy. These findings may raise the question of a  
415 prolonged antithrombotic therapy in the management of critical post-COVID-19. Further  
416 studies, based on invasive hemodynamic measurements during exercise are required to  
417 clarify our observations.

418

419

420

421

422

423

424

425

426

427

428

429

430

431

432

433

434

435 **Table 1.** Baseline characteristics of the study population.

|                                                  | <b><i>n</i> = 60</b> |
|--------------------------------------------------|----------------------|
| <b>Age</b> (years)                               | 64.6 ± 9.6           |
| <b>Male</b>                                      | 47 (78%)             |
| <b>BMI</b> (kg/m <sup>2</sup> )                  | 30.7 ± 5             |
| <b>Smoking status</b>                            |                      |
| Active smoker                                    | 1 (1.7%)             |
| Former smoker                                    | 33 (55%)             |
| Never smoker                                     | 26 (43.3%)           |
| <b>Comorbidities before SARS-CoV-2 infection</b> |                      |
| <b>Obesity (BMI &gt; 30)</b>                     | 33 (55%)             |
| <b>Cardiovascular</b>                            |                      |
| Ischemic heart disease                           | 5 (8.3%)             |
| Hypertension                                     | 28 (46.7%)           |
| Dyslipidemia                                     | 21 (35%)             |
| Diabetes                                         | 15 (25%)             |
| <b>Respiratory diseases</b>                      |                      |
| COPD                                             | 5 (8.3%)             |
| Asthma                                           | 6 (10%)              |
| Sleep apnea                                      | 12 (20%)             |

|                                                     |                    |
|-----------------------------------------------------|--------------------|
| <b>Thromboembolic disease</b>                       |                    |
| Deep vein thrombosis                                | 3 (5%)             |
| Pulmonary embolism                                  | 0 (0.0%)           |
| <b>Initial hospital management</b>                  |                    |
| <b>Intensive care unit</b>                          |                    |
| Length of ICU stay (days)                           | 21.2 ± 12.4        |
| ARDS                                                | 54 (90 %)          |
| Endotracheal intubation with mechanical ventilation | 54 (90 %)          |
| Neuromuscular blocking agents                       | 53 (89.8%)*        |
| High-dose steroids                                  | 27 (45%)           |
| Anticoagulant therapy                               | 55 (91.7%)         |
| Prone position                                      | 47 (79.7%)*        |
| Pulmonary embolism                                  | 16 (26.7%)         |
| DDimers (ng/ml)                                     | 2760 (1601-4507)** |
| Fibrinogen (g/L)                                    | 5.06 ± 1.16        |
| Creatinine (mg/dl)                                  | 87.0 (71-117)      |
| CRP (mg/ml)                                         | 199.8 ± 94.6       |
| Total WBC count (10 <sup>9</sup> /L)                | 5.4 ± 1.3          |
| <b>Pulmonology unit stay (days)</b>                 | 48.9 ± 36.5        |
| <b>Total length of stay (days)</b>                  | 68.1 ± 45.5        |
| <b>Rehabilitation center</b>                        | 39 (65%)           |
| <b>Home care physiotherapy</b>                      | 9 (15%)            |

436 Values are expressed as number of subjects (%), means ± SD or medians [first quartile; third  
437 quartile]. Abbreviations: BMI, Body Mass Index; COPD, Chronic Obstructive Pulmonary disease;  
438 ICU, Intensive Care Unit; £ARDS, Acute Respiratory Distress Syndrome, in accordance to the  
439 Berlin definition criteria; CRP, C-Reactive Protein; WBC, White Blood Cell. \*Data was unavailable  
440 for n=1 patient.\*\* Data was unavailable for n=6 patients.

441

442 **Table 2.** Characteristics of the study population at 12 months follow-up.

|                                       | <b>n = 60</b>      |
|---------------------------------------|--------------------|
| <b>Respiratory symptoms</b>           |                    |
| Dyspnea                               |                    |
| mMRC 0                                | 30 (50%)           |
| mMRC ≥ 1                              | 30 (50%)           |
| Cough                                 | 9 (15%)            |
| <b>Pulmonary function tests</b>       |                    |
| VC (L)                                | 3.7 (3.1-4.3)      |
| VC (% predicted)                      | 109 (95.8-120.5)   |
| FEV <sub>1</sub> (L)                  | 3.03 (2.5-3.5)     |
| FEV <sub>1</sub> (% predicted)        | 106.3 (94.5-123.5) |
| FEV <sub>1</sub> /VC (%)              | 81 (72.2-85)       |
| TLC (L)                               | 5.99 (5.1-6.6)     |
| TLC (% predicted)                     | 93 (85.2-103.5)    |
| D <sub>LCO</sub> cor (ml/min/mmHg)    | 23.8 (19.7-27.1)   |
| D <sub>LCO</sub> cor (% predicted)    | 99.1 (90.5-112.9)  |
| KCO (ml/min/mmHg/L)                   | 4.4 (9.9-4.8)      |
| KCO (% predicted)                     | 103 (94.3-114.9)   |
| pO <sub>2</sub> (mmHg)                | 82.2 ± 9.2         |
| pCO <sub>2</sub> (mmHg)               | 36.8 ± 3.9         |
| Bicarbonate (mmol/L)                  | 23.3 ± 2.1         |
| <b>Chest Computed tomography scan</b> |                    |
| Normal                                | 10 (16 %)          |
| Reticulations                         |                    |
| 1-25%                                 | 34 (57%)           |
| 26-50%                                | 8 (13%)            |
| >50%                                  | 0 (0.0%)           |
| Ground-glass opacities                |                    |
| 1-25%                                 | 27 (45%)           |
| 26-50%                                | 1 (1.7%)           |
| >50%                                  | 1 (1.7%)           |
| Bronchiectasis                        |                    |
| 1-25%                                 | 33 (55%)           |
| 26-50%                                | 2 (3.3%)           |
| >50%                                  | 0 (0.0%)           |
| Emphysema                             |                    |

---

|              |          |
|--------------|----------|
| 1-25%        | 5 (8.3%) |
| 26-50%       | 3 (5.0%) |
| >50%         | 3 (5.0%) |
| Honeycombing |          |
| 1-25%        | 3 (5.0%) |
| >25%         | 0 (0.0%) |

---

443 Data are shown as the number of subjects (%), means  $\pm$  SD (standard deviation) or medians [first  
444 quartile; third quartile]. Abbreviations: mMRC, modified Medical Research Council; FVC, Forced  
445 Vital Capacity; FEV1, Forced Expiratory Volume at 1st second; TLC, Total Lung Capacity;  $D_{LCOcor}$ ,  
446 Diffusion Capacity of carbon monoxide; KCO, Carbon monoxide transfer coefficient; PcapO<sub>2</sub>,  
447 capillary arterialized pO<sub>2</sub>; PcapCO<sub>2</sub>, capillary arterialized pCO<sub>2</sub>.

448

449

450 **Table 3.** Cardiopulmonary exercise test (CPET) results at 12 months follow-up (n=60).

| <b>Variables</b>                            | <b>Anaerobic threshold</b> | <b>Peak</b>       |
|---------------------------------------------|----------------------------|-------------------|
| <b>Reasons for stopping</b>                 |                            |                   |
| Leg discomfort                              | -                          | 33 (55%)          |
| Breathing discomfort                        | -                          | 22 (36.6%)        |
| Both                                        | -                          | 3 (5%)            |
| Other                                       | -                          | 2 (3.3%)          |
| <b>Performance</b>                          |                            |                   |
| Workload (W, % predicted)                   | 65.8 (57.5-73.2)           | 103 (92.5-121.3)  |
| V'O <sub>2</sub> (L/min)                    | 1.3 ± 0.3                  | 1.9 ± 0.5         |
| V'O <sub>2</sub> (L/min, % predicted)       | 65 (57.1-70.9)             | 98.2 (87.2-106.2) |
| V'O <sub>2</sub> (ml/min/kg)                | 14.2 ± 3.1                 | 21.8 ± 5.2        |
| V'O <sub>2</sub> , (ml/min/kg, % predicted) | 64.8 (57.2-70.9)           | 98.0 (87.2-106.3) |
| V'O <sub>2</sub> /Watts (ml/min/watts)      | 15.3 (14-16.5)             | 14.3 (13.5-15.7)  |
| MET                                         | 4.1 ± 0.9                  | 6.2 ± 1.5         |
| RER                                         | 0.9 ± 0.1                  | 1.1 ± 0.1         |
| <b>Ventilation</b>                          |                            |                   |
| VT (L)                                      | 7.7 ± 0.4                  | 2.2 ± 0.5         |
| VT (% FVC)                                  | 46.2 ± 10.9                | 59.8 ± 8.2        |
| VE (L/min)                                  | 39.7 ± 9.7                 | 81.9 ± 22         |
| RR (breaths/min)                            | 24 ± 5                     | 37 ± 6            |
| Breathing reserve (%)                       | 66.7 ± 8.7                 | 32.6 ± 13.7       |
| PetCO <sub>2</sub> (mmHg)                   | 39.6 ± 5.7*                | 34.3 ± 5.2*       |
| <b>Circulation</b>                          |                            |                   |
| HR (beats/min, % predicted)                 | 78.2 ± 11.2                | 96.6 ± 12.7       |
| Heart Rate reserve (%)                      | 24.3 (12.8-29.9)           | 2.3 (0-15)        |
| V'O <sub>2</sub> pulse (ml/beat/min)        | 10.5 ± 2.6                 | 12.9 ± 3.1        |
| V'O <sub>2</sub> pulse (% predicted)        | 84.6 ± 16.1                | 103.7 ± 19.9      |
| ΔHR/ΔV'O <sub>2</sub>                       | -                          | 41.9 (33.6-48.7)  |
| ΔV'O <sub>2</sub> /ΔWR                      | -                          | 14.2 (13.5-15.7)  |
| <b>Gas exchange</b>                         |                            |                   |
| V'E/V'O <sub>2</sub>                        | 31.7 ± 4.9                 | 42.7 ± 6.6        |
| V'E/V'CO <sub>2</sub>                       | 33.5 (30-37)               | 37.5 (34-42)      |
| V'E/V'CO <sub>2</sub> slope                 | -                          | 37.2 ± 6.7*       |
| OUES (L/min)                                | -                          | 1.8 (1.6-2.3)*    |
| pH                                          | 7.4 ± 0.03*                | 7.3 ± 0.05*       |
| pCapO <sub>2</sub> (mmHg)                   | 82.3 (73.4-85.4)*          | 85.4 (72.4-87)*   |

|                                |                    |                    |
|--------------------------------|--------------------|--------------------|
| pCapCO <sub>2</sub> (mmHg)     | 38.2 ± 4.1*        | 34.8 ± 4.1*        |
| P(A-a)O <sub>2</sub> (mmHg)    | 26.4 (22.4-34.9)*  | 35.2 (31.2-44.8)*  |
| V <sub>D</sub> /V <sub>T</sub> | 0.27 (0.21-0.34)** | 0.29 (0.25-0.35)** |
| <b>Metabolic</b>               |                    |                    |
| Lactatemia (mmol/L)            | 3.4 ± 1.1*         | 7.6 ± 2.2**        |

451 Data are shown as the number of subjects (%), means ± SD or medians [first quartile; third  
452 quartile]. Abbreviations: V'O<sub>2</sub>, oxygen uptake; MET, metabolic equivalent; ; RER, Respiratory  
453 Exchange Ratio; VT, tidal volume; FVC, Forced Vital Capacity; VE, minute ventilation; RR,  
454 respiratory rate; PetCO<sub>2</sub>, end-tidal pressure of CO<sub>2</sub>; HR, heart rate; WR: Work Rate; V'E/V'O<sub>2</sub> and  
455 V'E/V'CO<sub>2</sub>, ventilatory equivalents for oxygen and carbon dioxide; OUES, Oxygen Uptake  
456 Efficiency Slope; PcapO<sub>2</sub>, capillary arterialized pO<sub>2</sub>; PcapCO<sub>2</sub>, capillary arterialized pCO<sub>2</sub>; P(A-  
457 a)O<sub>2</sub> Alveolar-arterial gradient for O<sub>2</sub>; VD, dead space. \*Missing values for n=3 patients.  
458 \*\*Missing values for n=1 patient.

459

460

461 **Table 4.** Multiple linear regression identifying factors associated with  $V'O_2$  peak  
462 (ml/kg/min).

|                              | <b>p value</b>    | <b><math>\beta</math> coefficient</b> | <b>95% CI for <math>\beta</math></b> | <b>Standard error of <math>\beta</math></b> |
|------------------------------|-------------------|---------------------------------------|--------------------------------------|---------------------------------------------|
| Intercept                    | <b>&lt;0.0001</b> | 53.60                                 | 44.07 to 63.13                       | 4.75                                        |
| Age (years)                  | <b>&lt; 0.001</b> | -0.19                                 | -0.23 to -0.08                       | 0.05                                        |
| Sexe                         | <b>&lt; 0.001</b> | -4.36                                 | -6.85 to -1.90                       | 1.23                                        |
| BMI                          | <b>&lt; 0.001</b> | -0.42                                 | -0.65 to -0.19                       | 1.11                                        |
| Length of ICU stay<br>(days) | <b>0.01</b>       | -0.10                                 | -0.18 to -0.02                       | 0.04                                        |
| <b>R<sup>2</sup> 0.57</b>    |                   |                                       |                                      |                                             |

463

464

465

466



467  
468

**Table 5.** Comparison of patients with reduced and normal exercise capacity.

| Variables                                             | VO2 peak < 85%<br>(n=12) | VO2 peak ≥ 85%<br>(n=48) | p value      |
|-------------------------------------------------------|--------------------------|--------------------------|--------------|
| <b>Patient's characteristics</b>                      |                          |                          |              |
| Age (years)                                           | 65.4 (59.8-72.3)         | 68.1 (58.1-71.8)         | 0.96         |
| BMI (kg/m <sup>2</sup> )                              | 33.4 ± 6.2               | 30.1 ± 4.5               | <b>0.04</b>  |
| Smoker or former smoker                               | 8 (66.7%)                | 26 (54.2%)               | 0.52         |
| ICU stay (days)                                       | 29.7 ± 13.1              | 19.1 ± 11.3              | <b>0.006</b> |
| Ischemic heart disease                                | 1 (8.3%)                 | 4 (8.3%)                 | >0.99        |
| COPD                                                  | 1 (8.3%)                 | 4 (8.3%)                 | >0.99        |
| Asthma                                                | 2 (16.7%)                | 4 (8.3%)                 | 0.59         |
| Pulmonary embolism                                    | 3 (25%)                  | 13 (27.1%)               | 0.88         |
| Respiratory rehabilitation                            | 9 (75%)                  | 30 (62.5%)               | 0.41         |
| <b>Chest computed tomography scan #</b>               |                          |                          |              |
| Emphysema                                             | 4 (33.3%)                | 7 (14.6%)                | 0.69         |
| Reticulations                                         | 9 (75%)                  | 33 (68.7%)               | >0.99        |
| Traction bronchiectasis                               | 8 (66.7%)                | 27 (56.2%)               | 0.74         |
| Honeycombing                                          | 0 (0.0%)                 | 3 (6.2%)                 | >0.99        |
| Ground-glass opacities                                | 4 (33.3%)                | 25 (52.1%)               | 0.24         |
| <b>Pulmonary function tests</b>                       |                          |                          |              |
| FEV1 (% predicted)                                    | 97.4 ± 16.9              | 110.8 ± 19.7             | <b>0.03</b>  |
| FVC (% predicted)                                     | 97.5 ± 17.8              | 110.8 ± 16.9             | <b>0.01</b>  |
| TLC (%predicted)                                      | 87.7 ± 12.6              | 95.9 ± 14.3              | 0.07         |
| DL <sub>CO</sub> cor (%predicted)                     | 91.3 (65.6-98.1)         | 103 (92.3-114.2)         | <b>0.01</b>  |
| KCO (%predicted)                                      | 96.1 ± 29.9              | 104.8 ± 15.5             | 0.16         |
| <b>CPET at AT</b>                                     |                          |                          |              |
| PetCO <sub>2</sub> (mmHg)                             | 39.3 ± 6.9 *             | 39.6 ± 5.5 **            | 0.87         |
| Anaerobic threshold (%VO <sub>2</sub> peak predicted) | 59.1 (49.1-65.2)         | 66.1 (58.1-73.2)         | <b>0.01</b>  |
| <b>CPET at peak Performance</b>                       |                          |                          |              |
| Reasons for stopping exercise                         |                          |                          |              |
| Leg discomfort                                        | 8 (66.7%)                | 25 (52.1%)               | 0.51         |
| Dyspnea discomfort                                    | 4 (33.3%)                | 18 (37.5%)               | >0.99        |
| Both                                                  | 0 (0.0%)                 | 3 (6.2%)                 | >0.99        |
| Others                                                | 0 (0.0%)                 | 2 (4.2%)                 | >0.99        |

|                                           |                    |                    |                   |
|-------------------------------------------|--------------------|--------------------|-------------------|
| Effort duration (sec)                     | 547.6 ± 128.9      | 585.7 ± 86.2       | 0.21              |
| Workload (% predicted)                    | 85.7 (80.1-96.9)   | 107.2 (98.4-124.5) | <b>&lt;0.0001</b> |
| V'O <sub>2</sub> (L/min)                  | 1.6 ± 0.5          | 2.0 ± 0.5          | <b>0.03</b>       |
| V'O <sub>2</sub> (L/min, % predicted)     | 82.1 (73.7-83.7)   | 101.9 (94.6-107.7) | <b>&lt;0.0001</b> |
| V'O <sub>2</sub> (ml/min/kg)              | 16.9 ± 4.2         | 23.0 ± 4.7         | <b>0.0001</b>     |
| V'O <sub>2</sub> (ml/min/kg, % predicted) | 82 (73.9-83.9)     | 101.6 (94.8-107.5) | <b>&lt;0.0001</b> |
| MET                                       | 4.8 ± 1.2          | 6.6 ± 1.3          | <b>0.0001</b>     |
| <b>Ventilation</b>                        |                    |                    |                   |
| VE (L/min)                                | 74.9 ± 21.9        | 83.6 ± 21.9        | 0.22              |
| RER                                       | 1.1 ± 0.1          | 1.1 ± 0.1          | 0.14              |
| Breathing reserve (%)                     | 34.4 ± 15.4        | 32.1 ± 13.4        | 0.61              |
| PetCO <sub>2</sub> (mmHg)                 | 34.0 ± 5.3 *       | 34.3 ± 5.3 **      | 0.86              |
| <b>Circulation</b>                        |                    |                    |                   |
| HR (beats/min, %predicted)                | 94.3 ± 11.9        | 97.2 ± 12.9        | 0.49              |
| Heart rate reserve (%)                    | 4.1 (0-18.6)       | 1.6 (0-14.7)       | 0.68              |
| VO <sub>2</sub> pulse (%predicted)        | 83.9 ± 11.3        | 108.7 ± 18.6       | <b>&lt;0.0001</b> |
| ΔHR/ΔV'O <sub>2</sub>                     | 47.5 (36.6-51.2)   | 39.9 (32.2-47.5)   | 0.08              |
| ΔV'O <sub>2</sub> /ΔWR                    | 13.9 (12.9-16.1)   | 14.3 (13.6-15.3)   | 0.54              |
| <b>Gas exchange</b>                       |                    |                    |                   |
| VE/VO <sub>2</sub> ratio                  | 45.7 ± 7.9         | 42.1 ± 6.1         | 0.08              |
| OUES (L/min)                              | 1.6 (1.5-2.0)      | 1.9 (1.7-2.3)      | 0.14              |
| VE/VCO <sub>2</sub> ratio                 | 39.5 (33.5-47.0)   | 37.5 (34-41)       | 0.36              |
| VE/VCO <sub>2</sub> slope                 | 37.2 ± 7.6*        | 37.2 ± 6.6*        | 0.99              |
| VD/Vt                                     | 0.35 (0.28-0.40)*  | 0.29 (0.25-0.34)** | 0.06              |
| pH                                        | 7.3 ± 0.04**       | 7.3 ± 0.05         | 0.36              |
| pCapO <sub>2</sub> (mmHg)                 | 78.2 (54.2-82.1)*  | 83.8 (76.8-87.1)** | 0.05              |
| pCapCO <sub>2</sub> (mmHg)                | 35.9 (33.4-39.4)** | 34.7 (30.7-37.3)   | 0.14              |
| P(A-a) (mmHg)                             | 43.49 (29.7-60.5)* | 34.7 (31.7-43.9)** | 0.23              |
| <b>Metabolic</b>                          |                    |                    |                   |
| Lactatemia (mmol/L)                       | 7.2 ± 2.4*         | 7.7 ± 2.2          | 0.54              |

469 Data are shown as the number of subjects (%), means ± SD or medians [first quartile; third  
470 quartile], Student's t- or Mann–Whitney tests were computed to assess statistical differences for  
471 normal or non-normal quantitative. Fisher's exact test was used for analysis of contingency tables.  
472 Abbreviations: BMI, Body Mass Index; ICU, Intensive Care Unit; COPD: Chronic Obstructive  
473 Pulmonary Disease; FEV1, Forced Expiratory Volume at 1st second; FVC, Forced Vital Capacity;  
474 TLC, total lung capacity; DLCOcor, lung transfer for carbon monoxide; KCO, carbon monoxide

475 transfer coefficient;  $\dot{V}'O_2$ , oxygen uptake; MET, metabolic equivalent; RR, respiratory rate;  $\dot{V}'E$ ,  
476 minute ventilation; RER, respiratory exchange ratio;  $P_{et}CO_2$ , end-tidal pressure of  $CO_2$ ; HR, heart  
477 rate; WR: Work Rate;  $\dot{V}'CO_2$ , carbon dioxide production; OUES, oxygen uptake efficiency slope;  
478  $\dot{V}'E/\dot{V}'O_2$  and  $\dot{V}'E/\dot{V}'CO_2$ , ventilatory equivalents for oxygen and carbon dioxide;  $V_D$ , dead space;  
479  $V_t$ , tidal volume;  $P_{cap}O_2$ , capillary arterialized  $pO_2$ ;  $P_{cap}CO_2$ , capillary arterialized  $pCO_2$ ;  $P(A-$   
480  $a)O_2$ ; Alveolar-arterial gradient for  $O_2$ . \* Missing values for n=2 patients. \*\*Missing values for n=1  
481 patient.

482

483 **Table 6.** Results of univariate analysis to identify factors associated with peak VD/Vt in  
 484 patients with normal exercise capacity (n=48).

|                                             | $r^2$ | p value           |
|---------------------------------------------|-------|-------------------|
| <b>Patient's characteristics</b>            |       |                   |
| Age (years)                                 | 0.13  | <b>0.01</b>       |
| Sexe                                        | 0.07  | 0.07              |
| BMI (kg/m <sup>2</sup> )                    | 0.03  | 0.2               |
| Length of ICU stay (days)                   | 0.24  | 0.10              |
| Pulmonary embolism                          | 0.01  | 0.3               |
| CRP (mg/ml)                                 | 0.004 | 0.6               |
| Fibrinogen (g/L)                            | 0.009 | 0.5               |
| D-Dimers (ng/ml)                            | 0.12  | <b>0.02</b>       |
| Creatinine (mg/dl)                          | 0.07  | 0.07              |
| Total WBC count (10 <sup>9</sup> /L)        | 0.03  | 0.2               |
| <b>Pulmonary function tests</b>             |       |                   |
| FEV1 (% predicted)                          | 0.08  | 0.05              |
| FEV1 (L)                                    | 0.02  | 0.3               |
| VC (% predicted)                            | 0.03  | 0.2               |
| VC (L)                                      | 0.002 | 0.7               |
| DL <sub>CO</sub> cor (%predicted)           | 0.15  | <b>0.01</b>       |
| DL <sub>CO</sub> cor (ml/min/mmHg)          | 0.06  | 0.09              |
| <b>CPET at AT</b>                           |       |                   |
| PetCO <sub>2</sub>                          | -0.53 | <b>0.0001</b>     |
| %VO <sub>2</sub> peak predicted             | -0.11 | 0.46              |
| <b>CPET at peak</b>                         |       |                   |
| V'O <sub>2</sub> peak, ml/kg/min %predicted | -0.17 | 0.25              |
| V'O <sub>2</sub> peak, ml/kg/min            |       |                   |
| PetCO <sub>2</sub>                          | -0.43 | <b>0.003</b>      |
| V'E/VO <sub>2</sub> ratio                   | 0.48  | <b>0.0006</b>     |
| V'E/V'CO <sub>2</sub> ratio                 | 0.58  | <b>&lt;0.0001</b> |
| V'E/V'CO <sub>2</sub> slope                 | 0.53  | <b>0.0001</b>     |
| V'O <sub>2</sub> pulse (%predicted)         | 0.1   | 0.52              |
| pO <sub>2</sub> (mmHg)                      | 0.13  | <b>0.01</b>       |
| pCO <sub>2</sub> (mmHg)                     | 0.004 | 0.8               |
| P(A-a) (mmHg)                               | 0.46  | <b>0.01</b>       |

485 Abbreviations: BMI, Body Mass Index; ICU, Intensive Care Unit; CRP, C-Reactive Protein; WBC,  
 486 White Blood Cell; FEV1, Forced Expiratory Volume at 1st second; FVC, Forced Vital Capacity;  
 487 TLC, total lung capacity; DL<sub>CO</sub>cor, lung transfer for carbon monoxide; KCO, carbon monoxide

488 transfer coefficient;  $P_{et}CO_2$ , end-tidal pressure of  $CO_2$ ; RER, respiratory exchange ratio;  $V'O_2$ ,  
489 oxygen uptake;  $V'E/V'O_2$  and  $V'E/V'CO_2$ , ventilatory equivalents for oxygen and carbon dioxide;  
490 HR, heart rate;  $P_{cap}O_2$ , capillary arterialized  $pO_2$ ;  $P_{cap}CO_2$ , capillary arterialized  $pCO_2$ ;  $P(A-a)O_2$   
491 Alveolar-arterial  $O_2$  gradient.

492

493 **Figure Legends**

494

495 **Figure 1.** Scatterplot depicting the relationship of peak oxygen uptake ( $V'O_2$ ) with a) 6-  
496 minute walk test (MWT) distance b) length of ICU stay (days).

497 **Figure 2.** Evolution of ventilatory efficiency parameters from rest to peak in patients with  
498 normal exercise capacity (n=48). a)  $VD/V_t$  b) alveolar-arterial gradient c) PetCO

499 **Suppl Figure.** Flowchart of the prospective cohort study.

## 500 **References**

- 501 1. Lamers MM, Haagmans BL. SARS-CoV-2 pathogenesis. *Nat Rev Microbiol* 2022;  
502 20(5): 270-84.
- 503 2. Huang L, Yao Q, Gu X, et al. 1-year outcomes in hospital survivors with COVID-19:  
504 a longitudinal cohort study. *Lancet* 2021; 398(10302): 747-58.
- 505 3. Carfi A, Bernabei R, Landi F, Gemelli Against C-P-ACSG. Persistent Symptoms in  
506 Patients After Acute COVID-19. *JAMA* 2020; 324(6): 603-5.
- 507 4. American Thoracic S, American College of Chest P. ATS/ACCP Statement on  
508 cardiopulmonary exercise testing. *Am J Respir Crit Care Med* 2003; 167(2): 211-77.
- 509 5. Rinaldo RF, Mondoni M, Parazzini EM, et al. Deconditioning as main mechanism of  
510 impaired exercise response in COVID-19 survivors. *Eur Respir J* 2021; 58(2).
- 511 6. Skjorten I, Ankerstjerne OAW, Trebinjac D, et al. Cardiopulmonary exercise  
512 capacity and limitations 3 months after COVID-19 hospitalisation. *Eur Respir J* 2021;  
513 58(2).
- 514 7. Quanjer PH, Stanojevic S, Cole TJ, et al. Multi-ethnic reference values for  
515 spirometry for the 3-95-yr age range: the global lung function 2012 equations. *Eur Respir J*  
516 2012; 40(6): 1324-43.
- 517 8. Stanojevic S, Graham BL, Cooper BG, et al. Official ERS technical standards:  
518 Global Lung Function Initiative reference values for the carbon monoxide transfer factor for  
519 Caucasians. *Eur Respir J* 2017; 50(3).
- 520 9. Fletcher CM, Elmes PC, Fairbairn AS, Wood CH. The significance of respiratory  
521 symptoms and the diagnosis of chronic bronchitis in a working population. *Br Med J* 1959;  
522 2(5147): 257-66.
- 523 10. Hansell DM, Bankier AA, MacMahon H, McLoud TC, Muller NL, Remy J. Fleischner  
524 Society: glossary of terms for thoracic imaging. *Radiology* 2008; 246(3): 697-722.
- 525 11. Force ERST, Palange P, Ward SA, et al. Recommendations on the use of exercise  
526 testing in clinical practice. *Eur Respir J* 2007; 29(1): 185-209.
- 527 12. Borg G. Ratings of perceived exertion and heart rates during short-term cycle  
528 exercise and their use in a new cycling strength test. *Int J Sports Med* 1982; 3(3): 153-8.
- 529 13. Hansen JE, Sue DY, Wasserman K. Predicted values for clinical exercise testing.  
530 *Am Rev Respir Dis* 1984; 129(2 Pt 2): S49-55.
- 531 14. Force ADT, Ranieri VM, Rubenfeld GD, et al. Acute respiratory distress syndrome:  
532 the Berlin Definition. *JAMA* 2012; 307(23): 2526-33.
- 533 15. Sun XG, Hansen JE, Garatachea N, Storer TW, Wasserman K. Ventilatory  
534 efficiency during exercise in healthy subjects. *Am J Respir Crit Care Med* 2002; 166(11):

- 535 1443-8.
- 536 16. Richardson S, Hirsch JS, Narasimhan M, et al. Presenting Characteristics,  
537 Comorbidities, and Outcomes Among 5700 Patients Hospitalized With COVID-19 in the  
538 New York City Area. *JAMA* 2020; 323(20): 2052-9.
- 539 17. Clavario P, De Marzo V, Lotti R, et al. Cardiopulmonary exercise testing in COVID-  
540 19 patients at 3 months follow-up. *Int J Cardiol* 2021; 340: 113-8.
- 541 18. Ribeiro Baptista B, d'Humieres T, Schlemmer F, et al. Identification of factors  
542 impairing exercise capacity after severe COVID-19 pulmonary infection: a 3-month follow-  
543 up of prospective COVulnerability cohort. *Respir Res* 2022; 23(1): 68.
- 544 19. Herridge MS, Cheung AM, Tansey CM, et al. One-year outcomes in survivors of the  
545 acute respiratory distress syndrome. *N Engl J Med* 2003; 348(8): 683-93.
- 546 20. Ahmed H, Patel K, Greenwood DC, et al. Long-term clinical outcomes in survivors  
547 of severe acute respiratory syndrome and Middle East respiratory syndrome coronavirus  
548 outbreaks after hospitalisation or ICU admission: A systematic review and meta-analysis. *J*  
549 *Rehabil Med* 2020; 52(5): jrm00063.
- 550 21. Motiejunaite J, Balagny P, Arnoult F, et al. Hyperventilation: A Possible Explanation  
551 for Long-Lasting Exercise Intolerance in Mild COVID-19 Survivors? *Front Physiol* 2020;  
552 11: 614590.
- 553 22. Debeaumont D, Boujibar F, Ferrand-Devouge E, et al. Cardiopulmonary Exercise  
554 Testing to Assess Persistent Symptoms at 6 Months in People With COVID-19 Who  
555 Survived Hospitalization: A Pilot Study. *Phys Ther* 2021; 101(6).
- 556 23. Naeije R, Caravita S. Phenotyping long COVID. *Eur Respir J* 2021; 58(2).
- 557 24. Baratto C, Caravita S, Faini A, et al. Impact of COVID-19 on exercise  
558 pathophysiology: a combined cardiopulmonary and echocardiographic exercise study. *J*  
559 *Appl Physiol (1985)* 2021; 130(5): 1470-8.
- 560 25. Taverne J, Salvator H, Leboulch C, et al. High incidence of hyperventilation  
561 syndrome after COVID-19. *J Thorac Dis* 2021; 13(6): 3918-22.
- 562 26. Mancini DM, Brunjes DL, Lala A, Trivieri MG, Contreras JP, Natelson BH. Use of  
563 Cardiopulmonary Stress Testing for Patients With Unexplained Dyspnea Post-Coronavirus  
564 Disease. *JACC Heart Fail* 2021; 9(12): 927-37.
- 565 27. Fresard I, Genecand L, Altarelli M, et al. Dysfunctional breathing diagnosed by  
566 cardiopulmonary exercise testing in 'long COVID' patients with persistent dyspnoea. *BMJ*  
567 *Open Respir Res* 2022; 9(1).
- 568 28. Ambrosino P, Parrella P, Formisano R, et al. Cardiopulmonary Exercise  
569 Performance and Endothelial Function in Convalescent COVID-19 Patients. *J Clin Med*



- 570 2022; 11(5).
- 571 29. Robertson HT, Pellegrino R, Pini D, et al. Exercise response after rapid intravenous  
572 infusion of saline in healthy humans. *J Appl Physiol* (1985) 2004; 97(2): 697-703.
- 573 30. Dantzker DR, D'Alonzo GE. Pulmonary gas exchange and exercise performance in  
574 pulmonary hypertension. *Chest* 1985; 88(4 Suppl): 255S-7S.
- 575 31. Gille T, Laveneziana P. Cardiopulmonary exercise testing in interstitial lung  
576 diseases and the value of ventilatory efficiency. *Eur Respir Rev* 2021; 30(162).
- 577 32. Weatherald J, Philipenko B, Montani D, Laveneziana P. Ventilatory efficiency in  
578 pulmonary vascular diseases. *Eur Respir Rev* 2021; 30(161).
- 579 33. Adam SS, Key NS, Greenberg CS. D-dimer antigen: current concepts and future  
580 prospects. *Blood* 2009; 113(13): 2878-87.
- 581 34. Bonaventura A, Vecchie A, Dagna L, et al. Endothelial dysfunction and  
582 immunothrombosis as key pathogenic mechanisms in COVID-19. *Nat Rev Immunol* 2021;  
583 21(5): 319-29.
- 584 35. Rovas A, Osiaevi I, Buscher K, et al. Microvascular dysfunction in COVID-19: the  
585 MYSTIC study. *Angiogenesis* 2021; 24(1): 145-57.
- 586 36. Gamberini L, Mazzoli CA, Prediletto I, et al. Health-related quality of life profiles,  
587 trajectories, persistent symptoms and pulmonary function one year after ICU discharge in  
588 invasively ventilated COVID-19 patients, a prospective follow-up study. *Respir Med* 2021;  
589 189: 106665.

**a**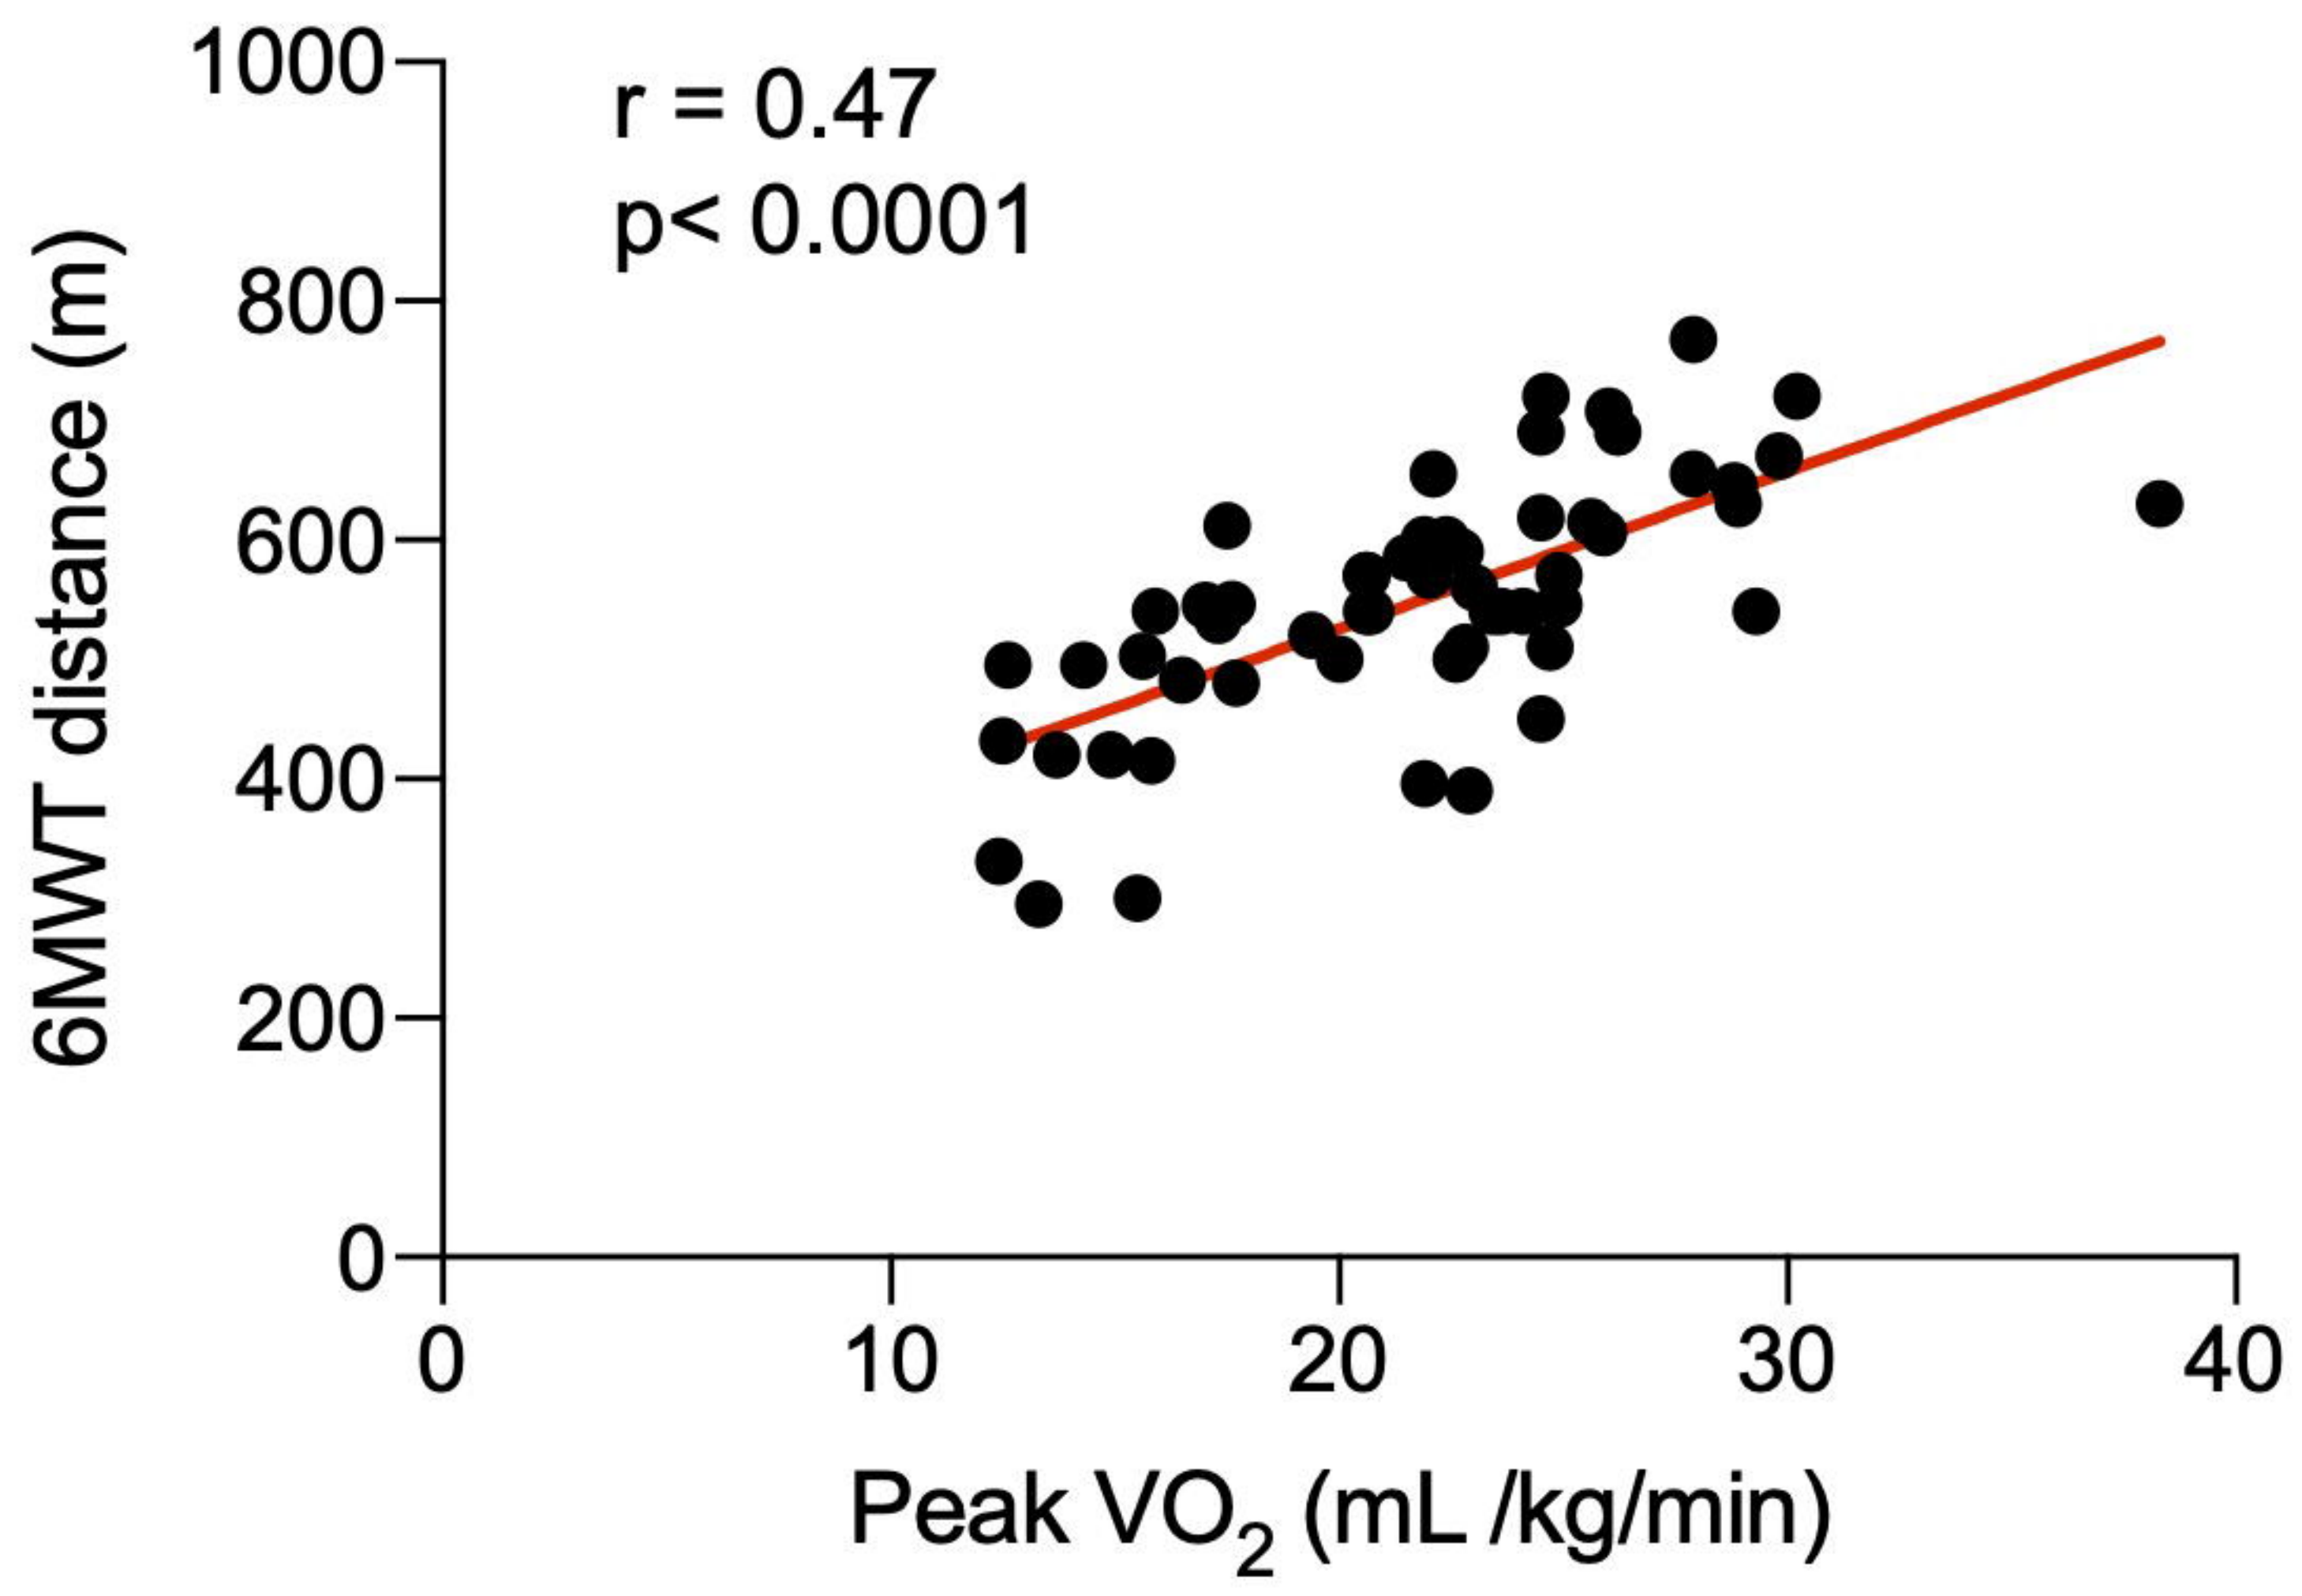**b**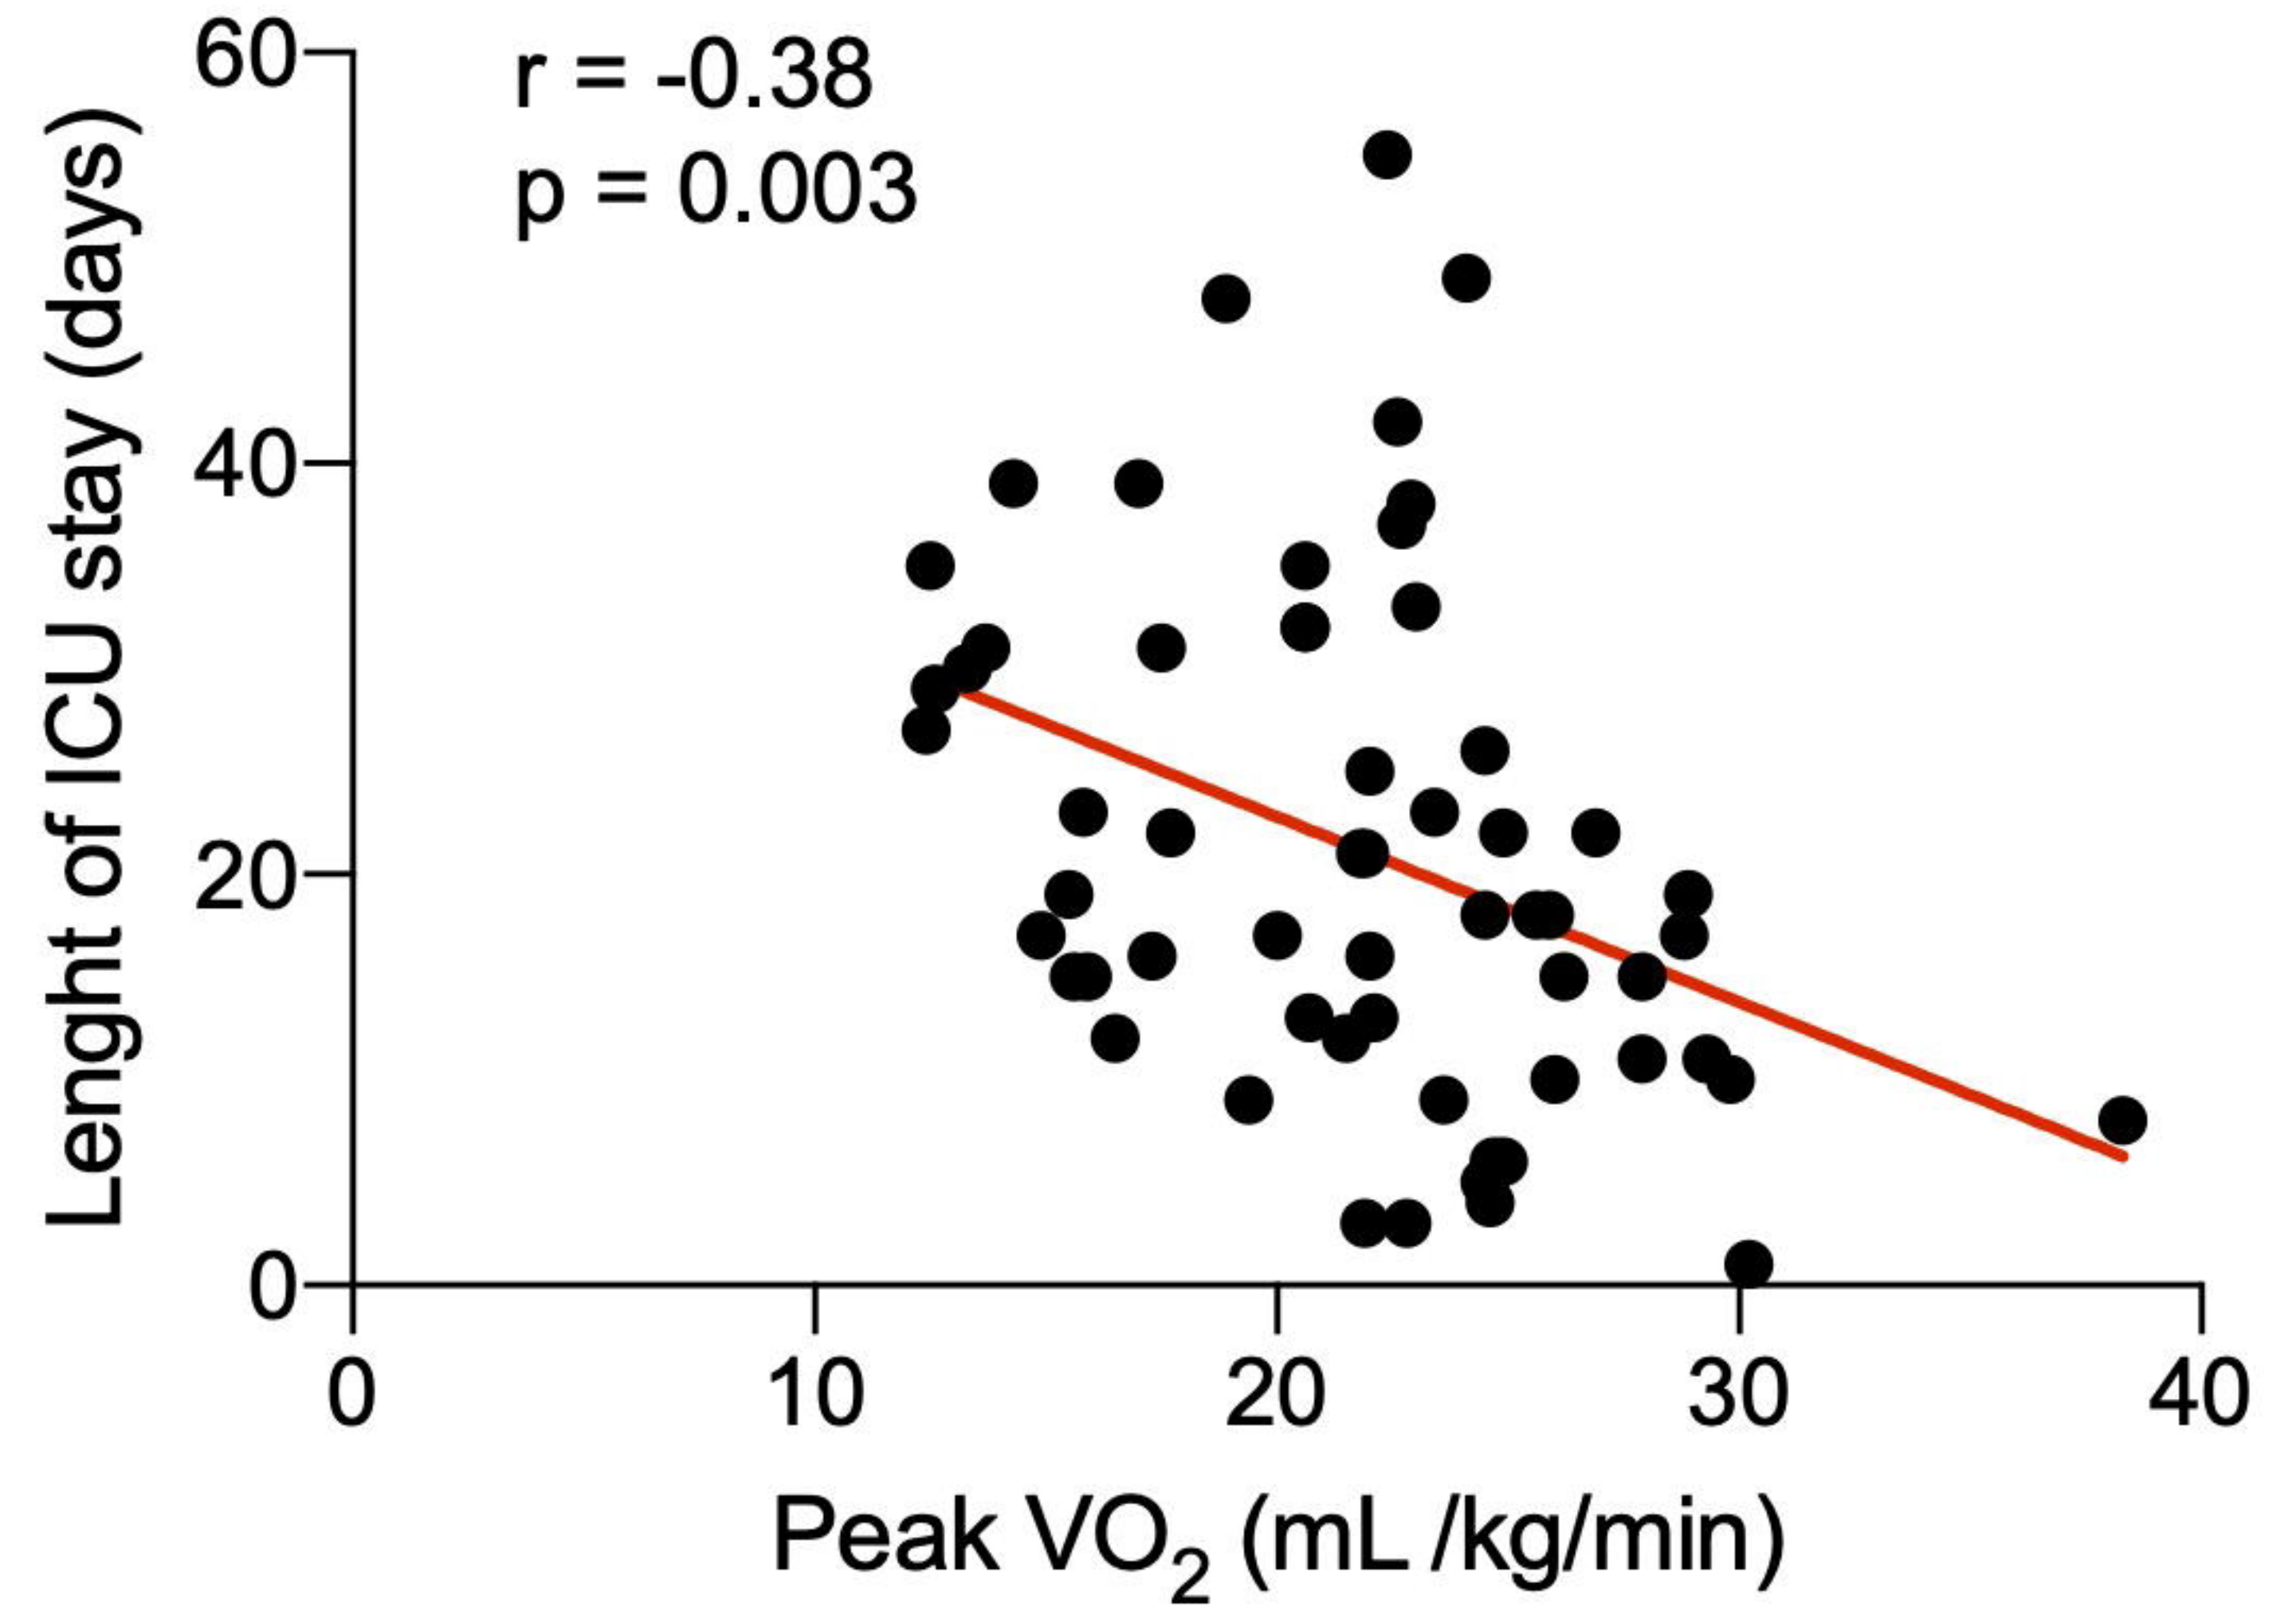

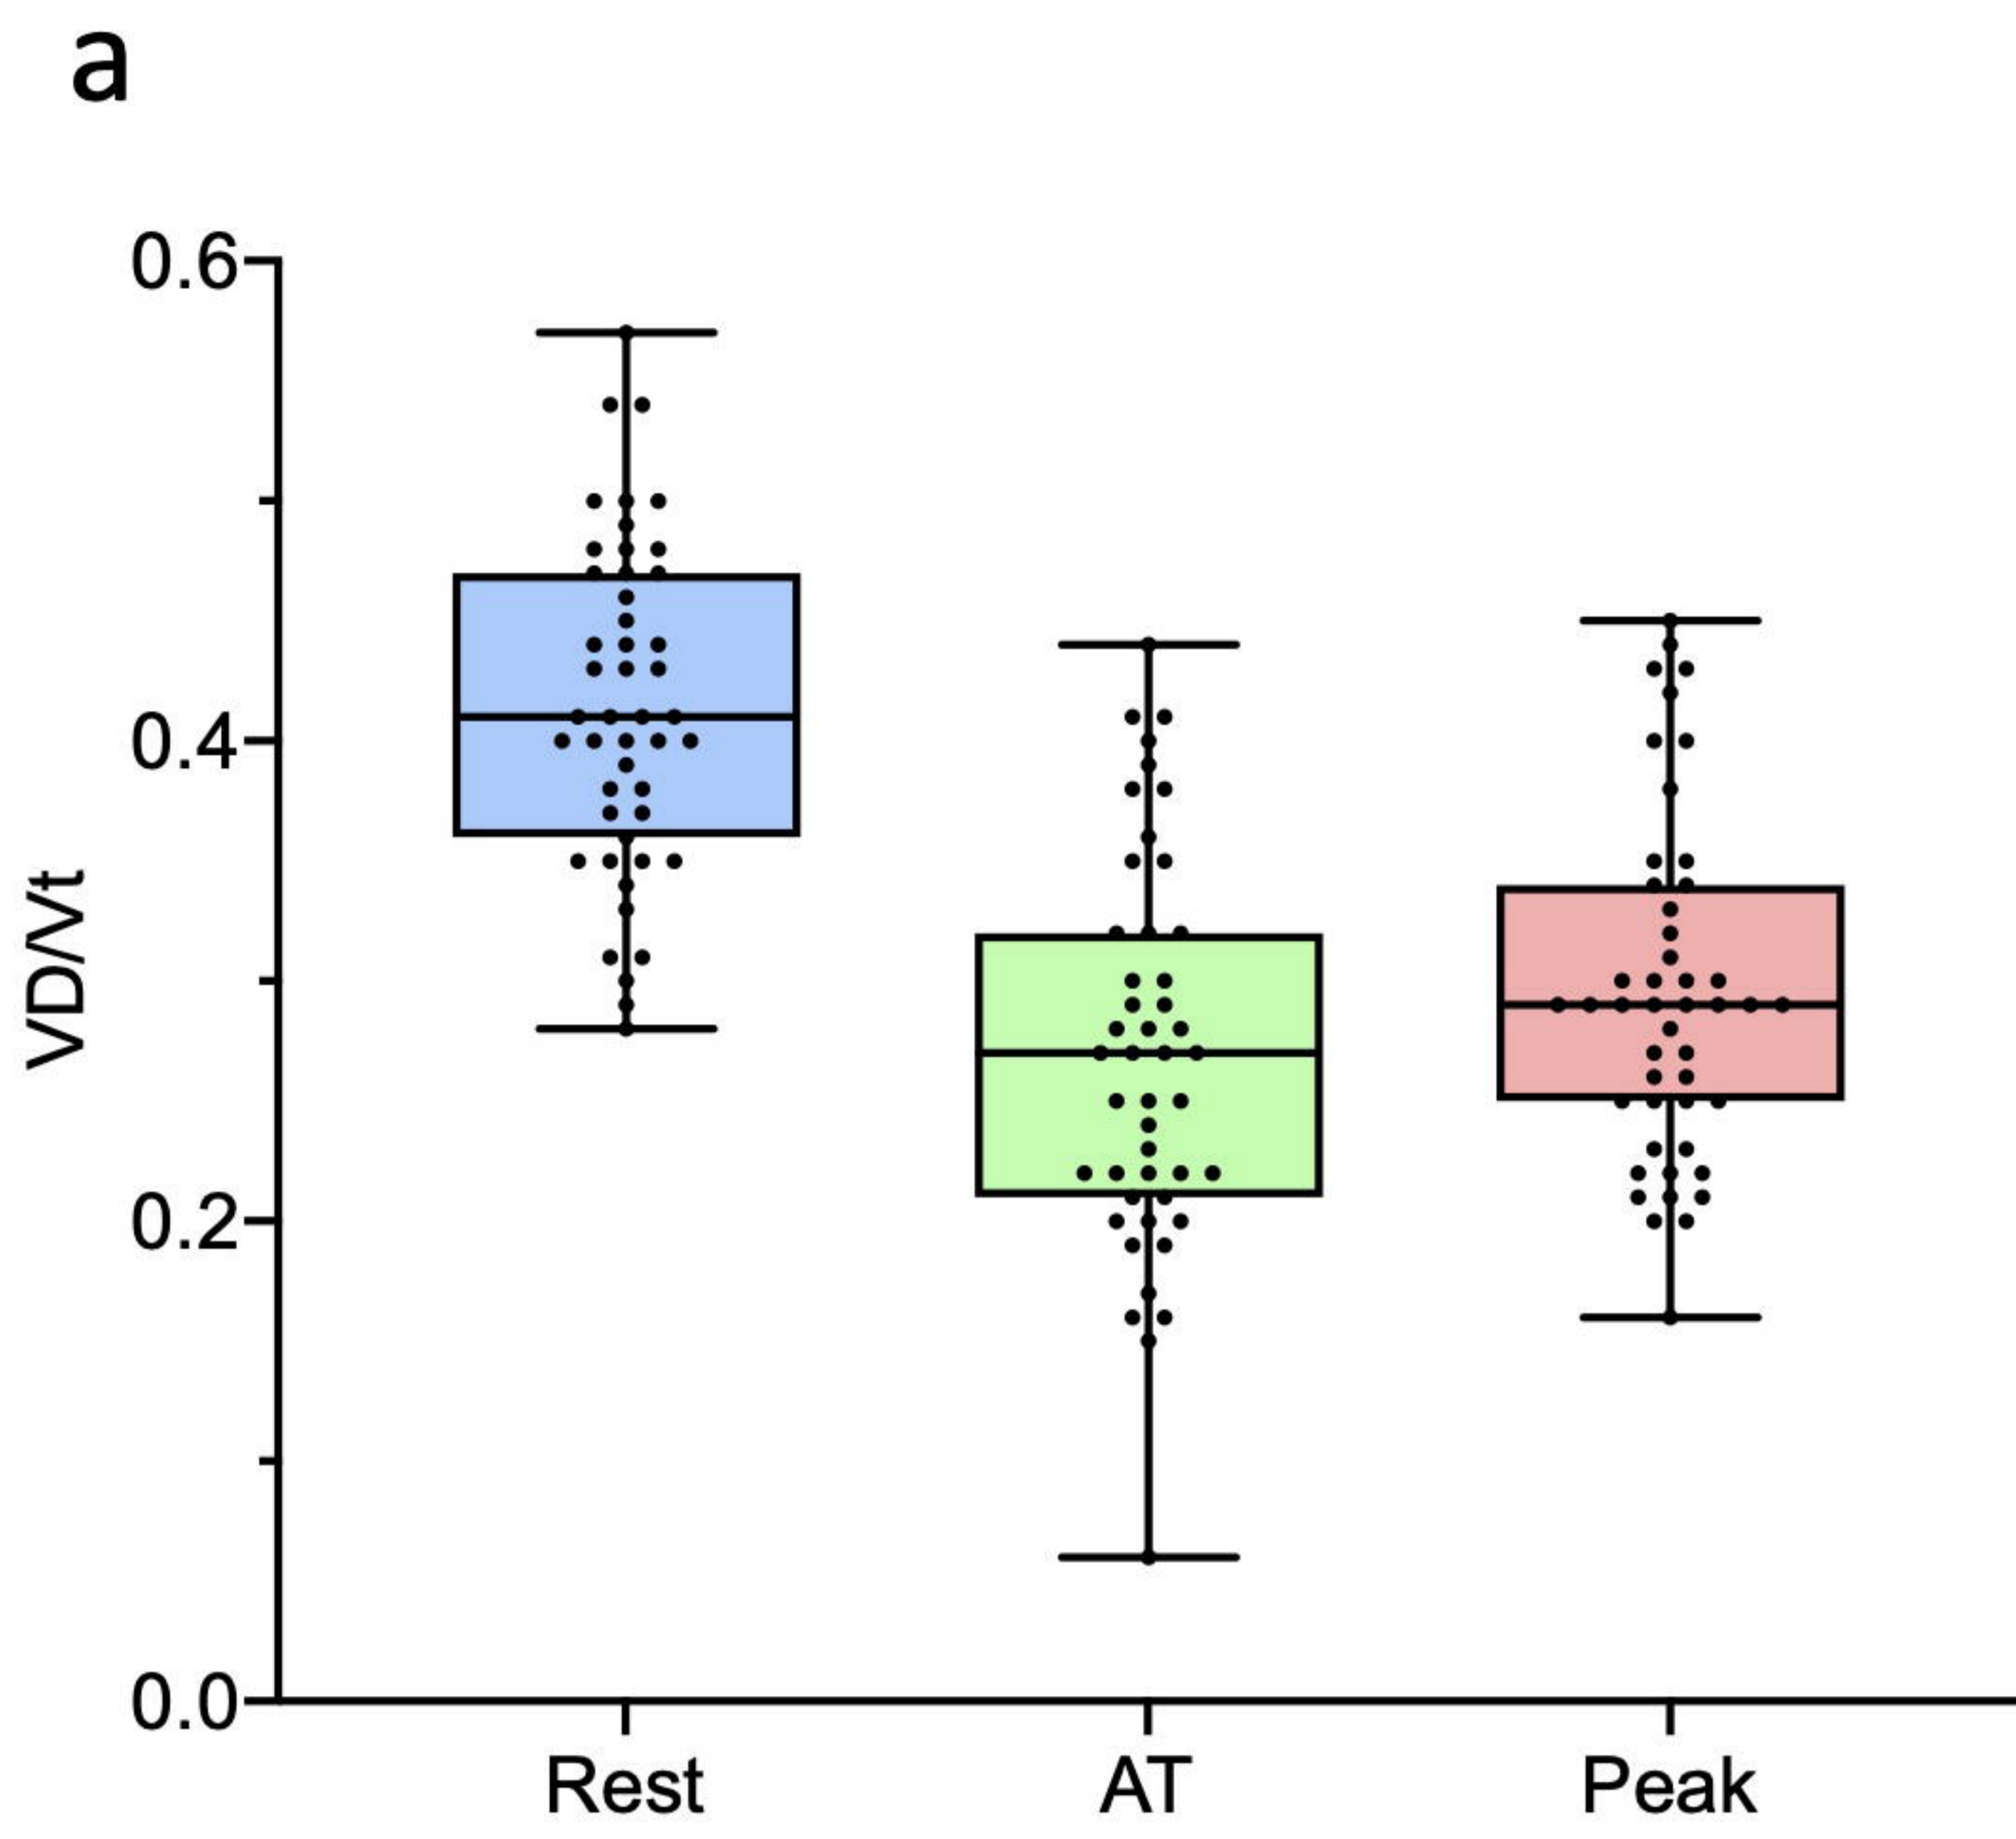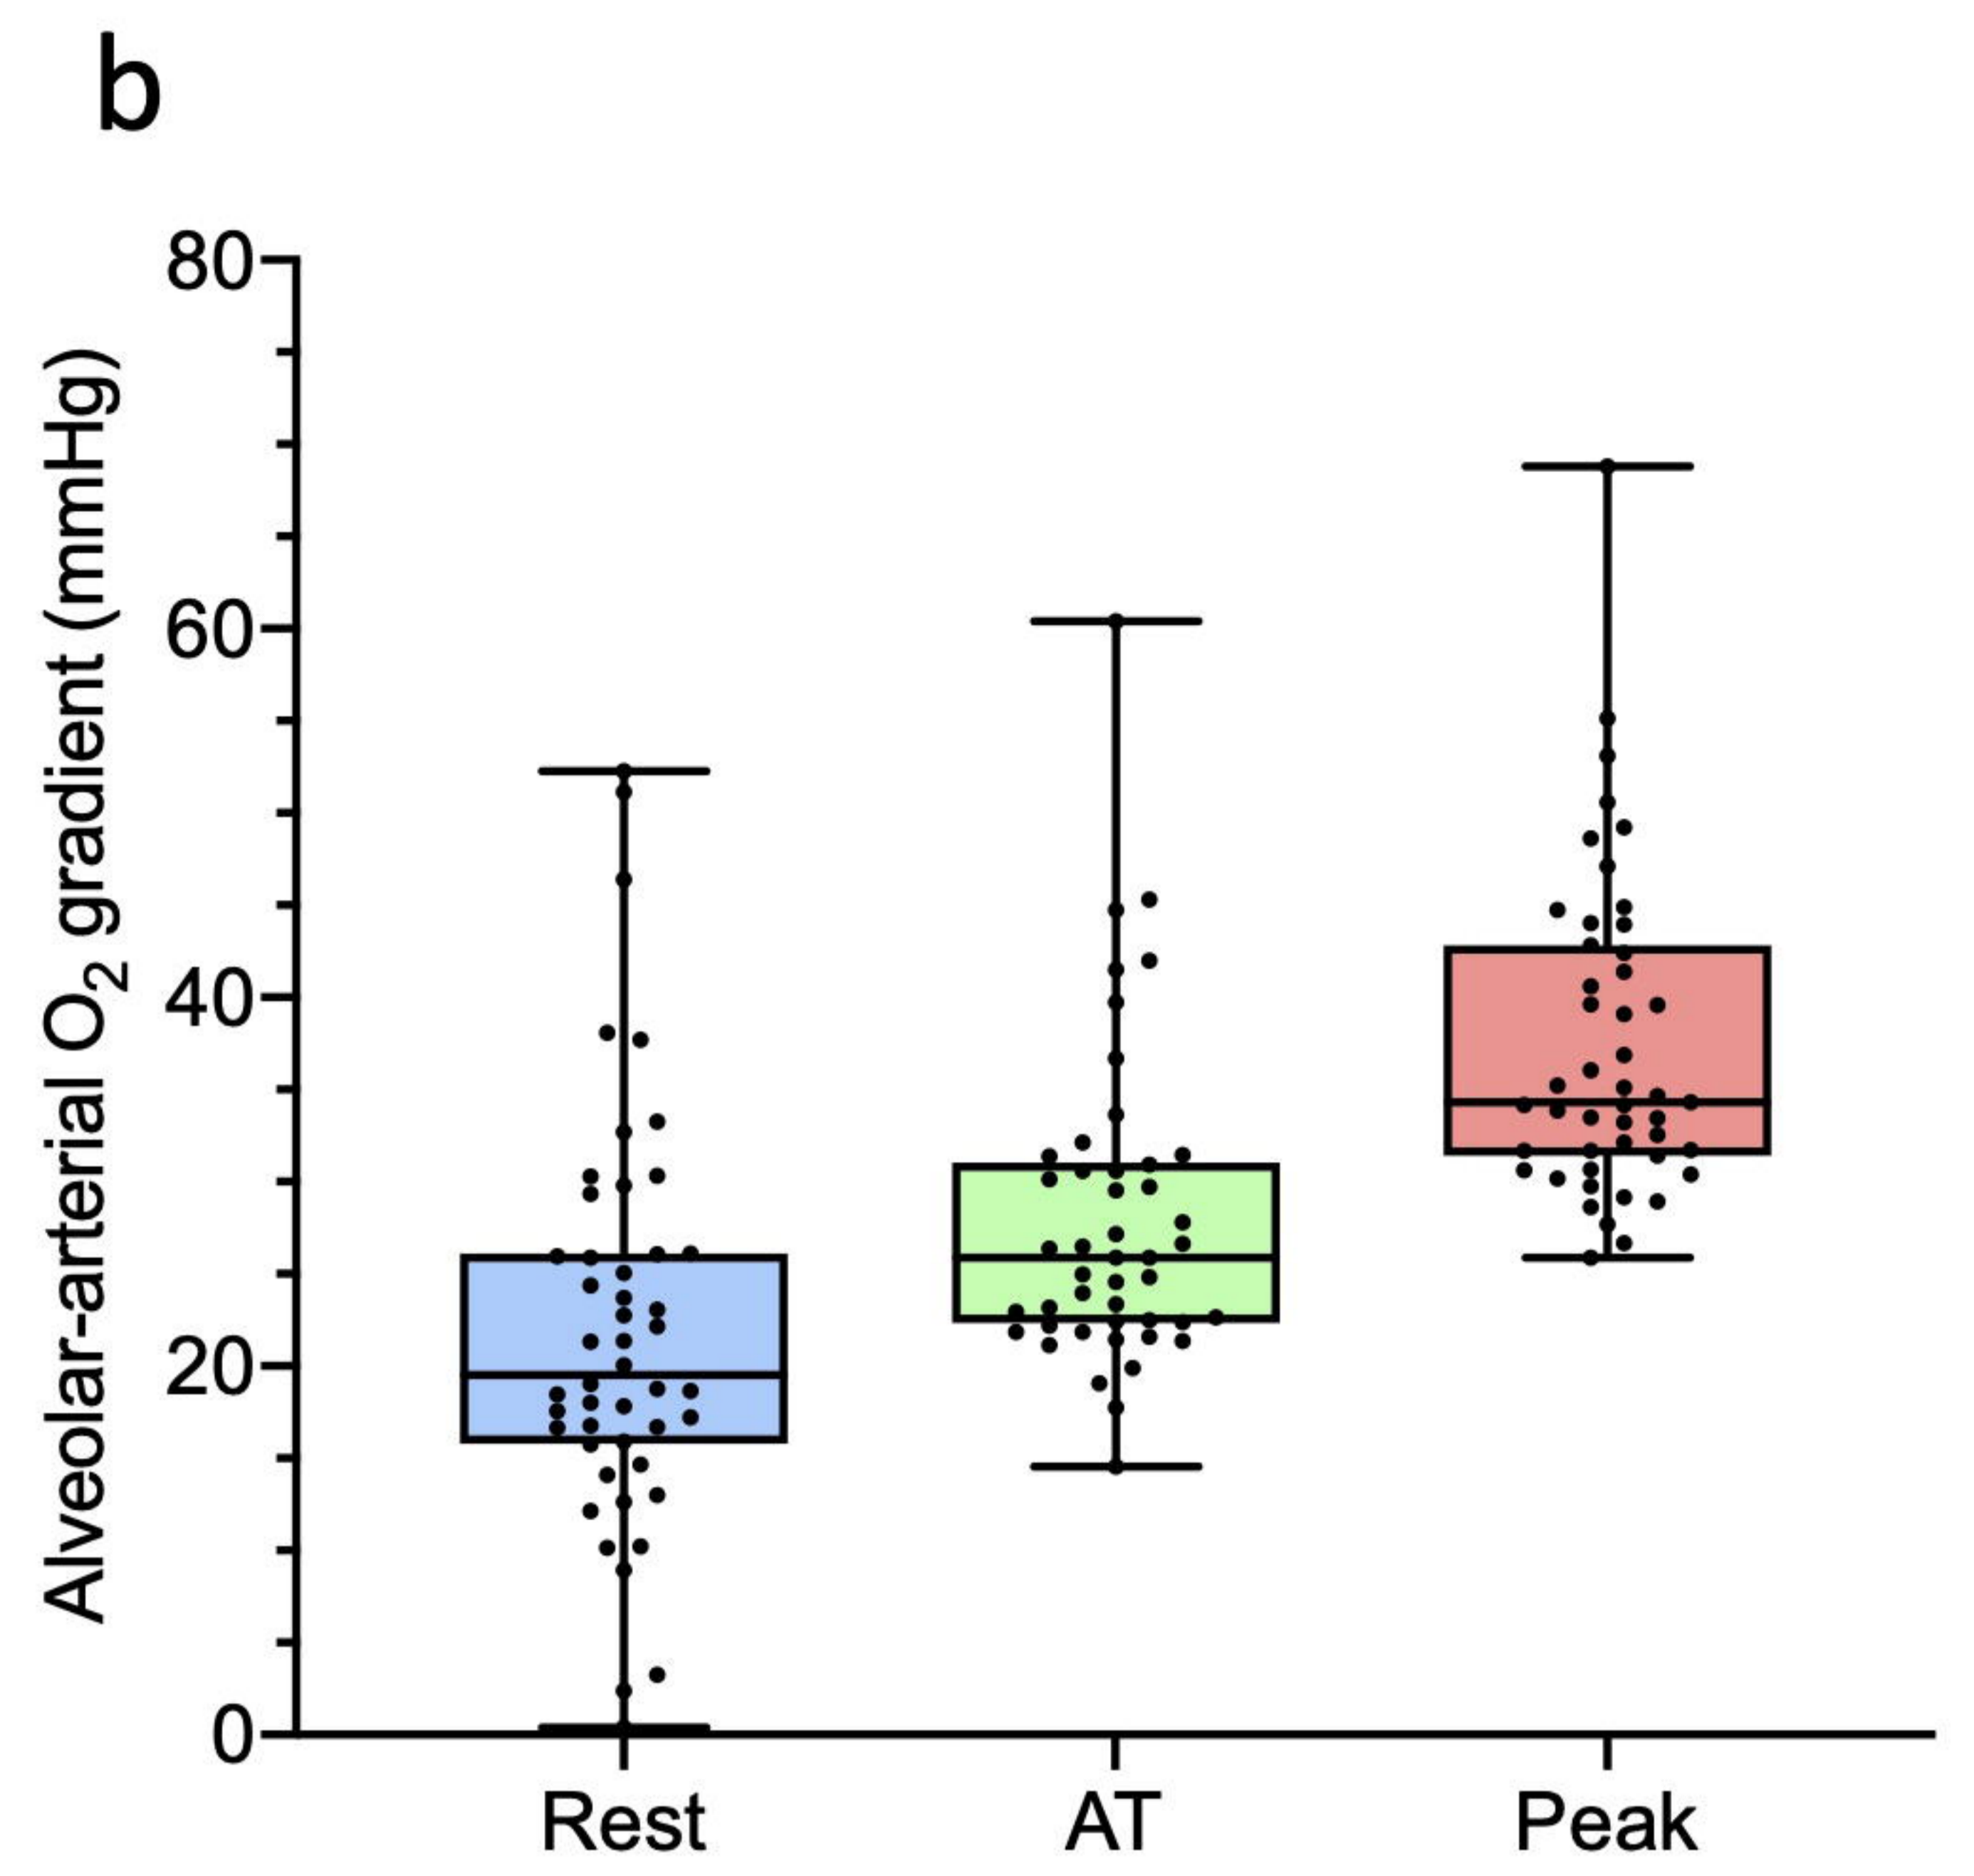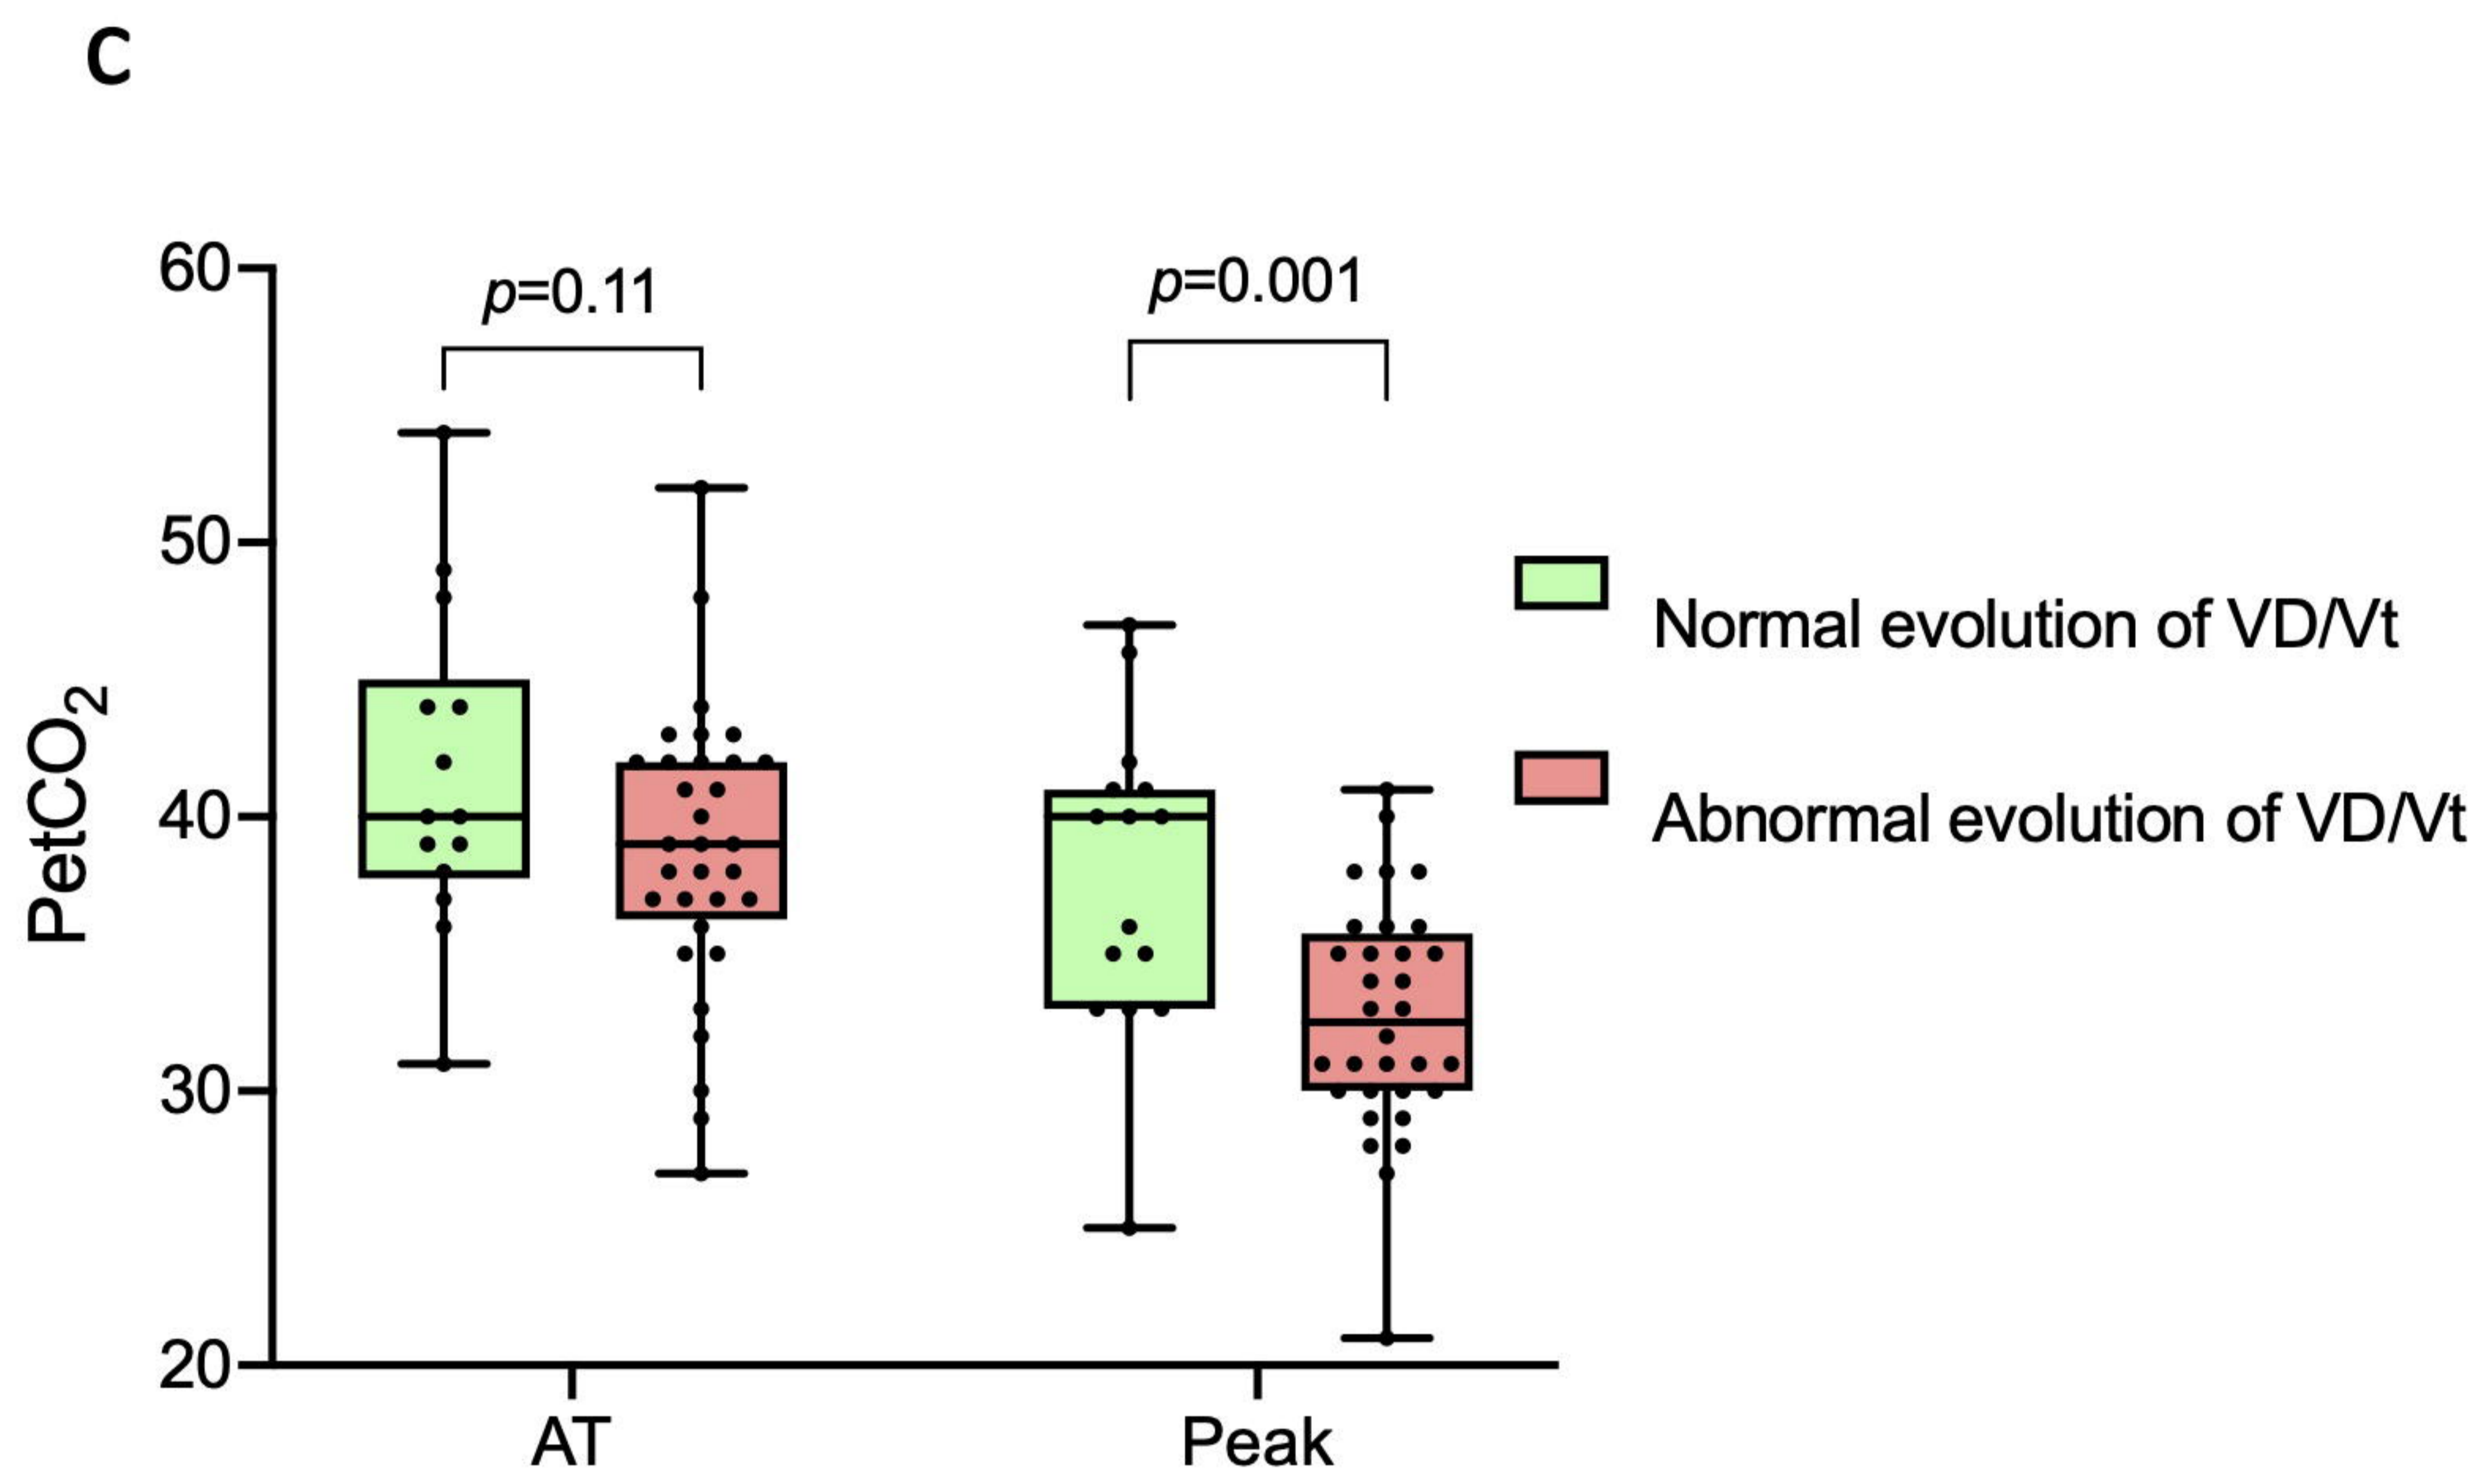

Source: https://www.medrxiv.org/content/10.1101/2022.09.12.22279779v1.full.pdf
